# Supplementary material for: Towards a Genetic Linkage Map of the California Condor, an Endangered New World Vulture Species
Source: MDPI journal article supplement (doi:10.3390/ani12233266), 2022-11-24
Supplement: s1 [file s1]

|            |      |            |             |            |          |            |       |            |        |            |     |            |          |            |        |            |          |            |          |            |        |            |          |   |
|------------|------|------------|-------------|------------|----------|------------|-------|------------|--------|------------|-----|------------|----------|------------|--------|------------|----------|------------|----------|------------|--------|------------|----------|---|
| Sample     | File | →          | Sample Name | →          | Run Name | →          | Panel | →          | Marker | →          | Dye | →          | Allele 1 | →          | Size 1 | →          | Height 1 | →          | Allele 2 | →          | Size 2 | →          | Height 2 | → |
| Allele 3   | →    | Size 3     | →           | Height 3   | →        | Allele 4   | →     | Size 4     | →      | Height 4   | →   | Allele 5   | →        | Size 5     | →      | Height 5   | →        | Allele 6   | →        | Size 6     | →      | Height 6   | →        |   |
| Allele 7   | →    | Size 7     | →           | Height 7   | →        | Allele 8   | →     | Size 8     | →      | Height 8   | →   | Allele 9   | →        | Size 9     | →      | Height 9   | →        | Allele 10  | →        | Size 10    | →      | Height 10  | →        |   |
| Allele 11  | →    | Size 11    | →           | Height 11  | →        | Allele 12  | →     | Size 12    | →      | Height 12  | →   | Allele 13  | →        | Size 13    | →      | Height 13  | →        | Allele 14  | →        | Size 14    | →      | Height 14  | →        |   |
| Height 14  | →    | Allele 15  | →           | Size 15    | →        | Height 15  | →     | Allele 16  | →      | Size 16    | →   | Height 16  | →        | Allele 17  | →      | Size 17    | →        | Height 17  | →        | Allele 18  | →      | Size 18    | →        |   |
| Size 18    | →    | Height 18  | →           | Allele 19  | →        | Size 19    | →     | Height 19  | →      | Allele 20  | →   | Size 20    | →        | Height 20  | →      | Allele 21  | →        | Size 21    | →        | Height 21  | →      | Allele 22  | →        |   |
| Allele 22  | →    | Size 22    | →           | Height 22  | →        | Allele 23  | →     | Size 23    | →      | Height 23  | →   | Allele 24  | →        | Size 24    | →      | Height 24  | →        | Allele 25  | →        | Size 25    | →      | Height 25  | →        |   |
| Height 25  | →    | Allele 26  | →           | Size 26    | →        | Height 26  | →     | Allele 27  | →      | Size 27    | →   | Height 27  | →        | Allele 28  | →      | Size 28    | →        | Height 28  | →        | Allele 29  | →      | Size 29    | →        |   |
| Size 29    | →    | Height 29  | →           | Allele 30  | →        | Size 30    | →     | Height 30  | →      | Allele 31  | →   | Size 31    | →        | Height 31  | →      | Allele 32  | →        | Size 32    | →        | Height 32  | →      | Allele 33  | →        |   |
| Allele 33  | →    | Size 33    | →           | Height 33  | →        | Allele 34  | →     | Size 34    | →      | Height 34  | →   | Allele 35  | →        | Size 35    | →      | Height 35  | →        | Allele 36  | →        | Size 36    | →      | Height 36  | →        |   |
| Height 36  | →    | Allele 37  | →           | Size 37    | →        | Height 37  | →     | Allele 38  | →      | Size 38    | →   | Height 38  | →        | Allele 39  | →      | Size 39    | →        | Height 39  | →        | Allele 40  | →      | Size 40    | →        |   |
| Size 40    | →    | Height 40  | →           | Allele 41  | →        | Size 41    | →     | Height 41  | →      | Allele 42  | →   | Size 42    | →        | Height 42  | →      | Allele 43  | →        | Size 43    | →        | Height 43  | →      | Allele 44  | →        |   |
| Allele 44  | →    | Size 44    | →           | Height 44  | →        | Allele 45  | →     | Size 45    | →      | Height 45  | →   | Allele 46  | →        | Size 46    | →      | Height 46  | →        | Allele 47  | →        | Size 47    | →      | Height 47  | →        |   |
| Height 47  | →    | Allele 48  | →           | Size 48    | →        | Height 48  | →     | Allele 49  | →      | Size 49    | →   | Height 49  | →        | Allele 50  | →      | Size 50    | →        | Height 50  | →        | Allele 51  | →      | Size 51    | →        |   |
| Size 51    | →    | Height 51  | →           | Allele 52  | →        | Size 52    | →     | Height 52  | →      | Allele 53  | →   | Size 53    | →        | Height 53  | →      | Allele 54  | →        | Size 54    | →        | Height 54  | →      | Allele 55  | →        |   |
| Allele 55  | →    | Size 55    | →           | Height 55  | →        | Allele 56  | →     | Size 56    | →      | Height 56  | →   | Allele 57  | →        | Size 57    | →      | Height 57  | →        | Allele 58  | →        | Size 58    | →      | Height 58  | →        |   |
| Height 58  | →    | Allele 59  | →           | Size 59    | →        | Height 59  | →     | Allele 60  | →      | Size 60    | →   | Height 60  | →        | Allele 61  | →      | Size 61    | →        | Height 61  | →        | Allele 62  | →      | Size 62    | →        |   |
| Size 62    | →    | Height 62  | →           | Allele 63  | →        | Size 63    | →     | Height 63  | →      | Allele 64  | →   | Size 64    | →        | Height 64  | →      | Allele 65  | →        | Size 65    | →        | Height 65  | →      | Allele 66  | →        |   |
| Allele 66  | →    | Size 66    | →           | Height 66  | →        | Allele 67  | →     | Size 67    | →      | Height 67  | →   | Allele 68  | →        | Size 68    | →      | Height 68  | →        | Allele 69  | →        | Size 69    | →      | Height 69  | →        |   |
| Height 69  | →    | Allele 70  | →           | Size 70    | →        | Height 70  | →     | Allele 71  | →      | Size 71    | →   | Height 71  | →        | Allele 72  | →      | Size 72    | →        | Height 72  | →        | Allele 73  | →      | Size 73    | →        |   |
| Size 73    | →    | Height 73  | →           | Allele 74  | →        | Size 74    | →     | Height 74  | →      | Allele 75  | →   | Size 75    | →        | Height 75  | →      | Allele 76  | →        | Size 76    | →        | Height 76  | →      | Allele 77  | →        |   |
| Allele 77  | →    | Size 77    | →           | Height 77  | →        | Allele 78  | →     | Size 78    | →      | Height 78  | →   | Allele 79  | →        | Size 79    | →      | Height 79  | →        | Allele 80  | →        | Size 80    | →      | Height 80  | →        |   |
| Height 80  | →    | Allele 81  | →           | Size 81    | →        | Height 81  | →     | Allele 82  | →      | Size 82    | →   | Height 82  | →        | Allele 83  | →      | Size 83    | →        | Height 83  | →        | Allele 84  | →      | Size 84    | →        |   |
| Size 84    | →    | Height 84  | →           | Allele 85  | →        | Size 85    | →     | Height 85  | →      | Allele 86  | →   | Size 86    | →        | Height 86  | →      | Allele 87  | →        | Size 87    | →        | Height 87  | →      | Allele 88  | →        |   |
| Allele 88  | →    | Size 88    | →           | Height 88  | →        | Allele 89  | →     | Size 89    | →      | Height 89  | →   | Allele 90  | →        | Size 90    | →      | Height 90  | →        | Allele 91  | →        | Size 91    | →      | Height 91  | →        |   |
| Height 91  | →    | Allele 92  | →           | Size 92    | →        | Height 92  | →     | Allele 93  | →      | Size 93    | →   | Height 93  | →        | Allele 94  | →      | Size 94    | →        | Height 94  | →        | Allele 95  | →      | Size 95    | →        |   |
| Size 95    | →    | Height 95  | →           | Allele 96  | →        | Size 96    | →     | Height 96  | →      | Allele 97  | →   | Size 97    | →        | Height 97  | →      | Allele 98  | →        | Size 98    | →        | Height 98  | →      | Allele 99  | →        |   |
| Allele 99  | →    | Size 99    | →           | Height 99  | →        | Allele 100 | →     | Size 100   | →      | Height 100 | →   | Allele 101 | →        | Size 101   | →      | Height 101 | →        | Allele 102 | →        | Size 102   | →      | Height 102 | →        |   |
| Height 102 | →    | Allele 103 | →           | Size 103   | →        | Height 103 | →     | Allele 104 | →      | Size 104   | →   | Height 104 | →        | Allele 105 | →      | Size 105   | →        | Height 105 | →        | Allele 106 | →      | Size 106   | →        |   |
| Allele 106 | →    | Size 106   | →           | Height 106 | →        | Allele 107 | →     | Size 107   | →      | Height 107 | →   | Allele 108 | →        | Size 108   | →      | Height 108 | →        | Allele 109 | →        | Size 109   | →      | Height 109 | →        |   |
| Height 109 | →    | Allele 110 | →           | Size 110   | →        | Height 110 | →     | Allele 111 | →      | Size 111   | →   | Height 111 | →        | Allele 112 | →      | Size 112   | →        | Height 112 | →        | Allele 113 | →      | Size 113   | →        |   |
| Allele 113 | →    | Size 113   | →           | Height 113 | →        | Allele 114 | →     | Size 114   | →      | Height 114 | →   | Allele 115 | →        | Size 115   | →      | Height 115 | →        | Allele 116 | →        | Size 116   | →      | Height 116 | →        |   |
| Height 116 | →    | Allele 117 | →           | Size 117   | →        | Height 117 | →     | Allele 118 | →      | Size 118   | →   | Height 118 | →        | Allele 119 | →      | Size 119   | →        | Height 119 | →        | Allele 120 | →      | Size 120   | →        |   |
| Allele 120 | →    | Size 120   | →           | Height 120 | →        | Allele 121 | →     | Size 121   | →      | Height 121 | →   | Allele 122 | →        | Size 122   | →      | Height 122 | →        | Allele 123 | →        | Size 123   | →      | Height 123 | →        |   |
| Height 123 | →    | Allele 124 | →           | Size 124   | →        | Height 124 | →     | Allele 125 | →      | Size 125   | →   | Height 125 | →        | Allele 126 | →      | Size 126   | →        | Height 126 | →        | Allele 127 | →      | Size 127   | →        |   |
| Allele 127 | →    | Size 127   | →           | Height 127 | →        | Allele 128 | →     | Size 128   | →      | Height 128 | →   | Allele 129 | →        | Size 129   | →      | Height 129 | →        | Allele 130 | →        | Size 130   | →      | Height 130 | →        |   |
| Height 130 | →    | Allele 131 | →           | Size 131   | →        | Height 131 | →     | Allele 132 | →      | Size 132   | →   | Height 132 | →        | Allele 133 | →      | Size 133   | →        | Height 133 | →        | Allele 134 | →      | Size 134   | →        |   |
| Allele 134 | →    | Size 134   | →           | Height 134 | →        | Allele 135 | →     | Size 135   | →      | Height 135 | →   | Allele 136 | →        | Size 136   | →      | Height 136 | →        | Allele 137 | →        | Size 137   | →      | Height 137 | →        |   |
| Height 137 | →    | Allele 138 | →           | Size 138   | →        | Height 138 | →     | Allele 139 | →      | Size 139   | →   | Height 139 | →        | Allele 140 | →      | Size 140   | →        | Height 140 | →        | Allele 141 | →      | Size 141   | →        |   |
| Allele 141 | →    | Size 141   | →           | Height 141 | →        | Allele 142 | →     | Size 142   | →      | Height 142 | →   | Allele 143 | →        | Size 143   | →      | Height 143 | →        | Allele 144 | →        | Size 144   | →      | Height 144 | →        |   |



| Ordinal No. | Chick # | Dad # | Mom # | Sex | Chondrodystrophy (0, no; 1, yes) |
|-------------|---------|-------|-------|-----|----------------------------------|
| 1           | 4       | 0     | 0     | M   | 0                                |
| 2           | 10      | 0     | 0     | F   | 0                                |
| 3           | 11      | 0     | 0     | F   | 0                                |
| 4           | 12      | 0     | 0     | F   | 0                                |
| 5           | 13      | 0     | 0     | F   | 0                                |
| 6           | 20      | 0     | 0     | M   | 0                                |
| 7           | 21      | 2     | 11    | M   | 0                                |
| 8           | 23      | 4     | 8     | M   | 0                                |
| 9           | 25      | 3     | 12    | M   | 0                                |
| 10          | 27      | 4     | 8     | M   | 0                                |
| 11          | 30      | 3     | 12    | F   | 0                                |
| 12          | 31      | 3     | 12    | F   | 0                                |
| 13          | 32      | 6     | 10    | F   | 0                                |
| 14          | 37      | 6     | 10    | F   | 0                                |
| 15          | 39      | 3     | 12    | F   | 0                                |
| 16          | 40      | 3     | 12    | F   | 0                                |
| 17          | 42      | 6     | 10    | M   | 0                                |
| 18          | 44      | 21    | 12    | M   | 0                                |
| 19          | 45      | 20    | 13    | F   | 0                                |
| 20          | 47      | 20    | 13    | M   | 0                                |
| 21          | 48      | 27    | 31    | M   | 0                                |
| 22          | 54      | 42    | 39    | F   | 0                                |
| 23          | 55      | 27    | 31    | M   | 0                                |
| 24          | 56      | 27    | 31    | F   | 0                                |
| 25          | 57      | 23    | 32    | F   | 0                                |
| 26          | 59      | 42    | 39    | F   | 0                                |
| 27          | 64      | 21    | 40    | F   | 0                                |
| 28          | 75      | 27    | 31    | M   | 0                                |
| 29          | 76      | 27    | 31    | F   | 0                                |
| 30          | 77      | 27    | 31    | F   | 0                                |
| 31          | 78      | 21    | 40    | M   | 0                                |
| 32          | 79      | 21    | 40    | F   | 0                                |
| 33          | 81      | 42    | 39    | F   | 0                                |
| 34          | 82      | 23    | 32    | F   | 0                                |
| 35          | 83      | 25    | 37    | M   | 0                                |
| 36          | 84      | 25    | 37    | F   | 0                                |
| 37          | 87      | 23    | 32    | M   | 0                                |
| 38          | 88      | 23    | 32    | F   | 0                                |
| 39          | 89      | 27    | 31    | M   | 0                                |
| 40          | 92      | 42    | 39    | M   | 0                                |
| 41          | 97      | 44    | 45    | F   | 0                                |
| 42          | 99      | 27    | 31    | M   | 0                                |
| 43          | 100     | 25    | 37    | M   | 0                                |
| 44          | 101     | 25    | 37    | F   | 0                                |
| 45          | 102     | 23    | 32    | M   | 0                                |
| 46          | 103     | 23    | 32    | F   | 0                                |
| 47          | 107     | 21    | 40    | M   | 0                                |
| 48          | 108     | 42    | 39    | F   | 0                                |
| 49          | 111     | 44    | 45    | F   | 0                                |
| 50          | 113     | 44    | 45    | F   | 0                                |
| 51          | 114     | 23    | 32    | M   | 0                                |
| 52          | 122     | 21    | 40    | M   | 0                                |
| 53          | 123     | 42    | 39    | M   | 0                                |

|     |     |    |    |   |   |
|-----|-----|----|----|---|---|
| 54  | 124 | 42 | 39 | F | 0 |
| 55  | 125 | 44 | 45 | M | 0 |
| 56  | 126 | 44 | 45 | F | 0 |
| 57  | 127 | 25 | 37 | F | 0 |
| 58  | 128 | 27 | 31 | F | 0 |
| 59  | 142 | 27 | 31 | M | 0 |
| 60  | 143 | 27 | 31 | F | 0 |
| 61  | 145 | 42 | 39 | M | 0 |
| 62  | 146 | 42 | 39 | F | 0 |
| 63  | 149 | 21 | 40 | F | 0 |
| 64  | 150 | 47 | 30 | F | 0 |
| 65  | 151 | 21 | 40 | F | 0 |
| 66  | 152 | 25 | 37 | F | 0 |
| 67  | 154 | 44 | 45 | F | 0 |
| 68  | 156 | 21 | 40 | F | 0 |
| 69  | 160 | 27 | 31 | F | 1 |
| 70  | 161 | 25 | 37 | F | 0 |
| 71  | 162 | 42 | 39 | M | 0 |
| 72  | 164 | 23 | 32 | M | 0 |
| 73  | 165 | 47 | 30 | M | 0 |
| 74  | 169 | 23 | 32 | M | 0 |
| 75  | 170 | 42 | 39 | M | 0 |
| 76  | 174 | 44 | 45 | F | 0 |
| 77  | 175 | 25 | 37 | M | 0 |
| 78  | 180 | 44 | 45 | F | 0 |
| 79  | 182 | 47 | 30 | F | 0 |
| 80  | 183 | 23 | 32 | F | 0 |
| 81  | 185 | 42 | 39 | M | 0 |
| 82  | 189 | 23 | 32 | M | 0 |
| 83  | 191 | 47 | 30 | F | 0 |
| 84  | 192 | 21 | 40 | F | 0 |
| 85  | 195 | 44 | 45 | F | 0 |
| 86  | 196 | 25 | 37 | F | 0 |
| 87  | 203 | 47 | 30 | M | 0 |
| 88  | 210 | 47 | 30 | F | 0 |
| 89  | 212 | 21 | 40 | F | 0 |
| 90  | 213 | 25 | 37 | M | 0 |
| 91  | 214 | 23 | 32 | F | 0 |
| 92  | 217 | 44 | 45 | F | 0 |
| 93  | 219 | 44 | 45 | M | 0 |
| 94  | 222 | 25 | 37 | F | 0 |
| 95  | 225 | 23 | 32 | F | 0 |
| 96  | 231 | 21 | 40 | F | 0 |
| 97  | 235 | 47 | 30 | F | 0 |
| 98  | 236 | 23 | 32 | F | 0 |
| 99  | 237 | 44 | 45 | M | 0 |
| 100 | 238 | 25 | 37 | M | 0 |
| 101 | 241 | 55 | 84 | F | 0 |
| 102 | 242 | 44 | 45 | M | 0 |
| 103 | 243 | 47 | 30 | M | 0 |
| 104 | 250 | 55 | 84 | M | 0 |
| 105 | 251 | 21 | 40 | M | 0 |
| 106 | 257 | 47 | 30 | M | 0 |
| 107 | 264 | 25 | 37 | F | 0 |
| 108 | 265 | 44 | 45 | M | 0 |

|     |      |    |    |   |   |
|-----|------|----|----|---|---|
| 109 | 269  | 42 | 39 | M | 0 |
| 110 | 270  | 44 | 45 | M | 0 |
| 111 | 272  | 55 | 84 | M | 0 |
| 112 | 280  | 47 | 30 | F | 0 |
| 113 | 286  | 23 | 32 | M | 0 |
| 114 | 292  | 42 | 39 | F | 0 |
| 115 | 297  | 47 | 30 | F | 0 |
| 116 | 309  | 47 | 30 | M | 0 |
| 117 | 313  | 42 | 39 | M | 0 |
| 118 | 332  | 42 | 39 | M | 0 |
| 119 | 341  | 55 | 84 | M | 0 |
| 120 | 1405 | 27 | 31 | M | 1 |
| 121 | 2537 | 27 | 31 | M | 1 |

The loci that were supposed to be used in the post-genotyping analysis included the following combined set of markers:

|                 |                                    |
|-----------------|------------------------------------|
| Newly designed: | 296 markers                        |
| Old:            | 17 original + 3 Ellegren's markers |
| Total:          | 316                                |

If all markers would be workable in all 121 individuals, we would expect a total of 38,236 genotypes.

There were various errors in the data that required a very careful check of almost every datapoint out of approximately 25,000 genotyping entries that remained after removing the failed markers.

### 2.3. Second round

At this step, we looked more deeply into the datasets produced for individual markers by sifting an estimate of 25,000 datapoints. The actual data contained entries for 198 loci, and if we had 100% success rate for all of them, the expected total number of genotypes in 121 individuals would be 23,958.

In reality, there were entries with "zero" alleles (i.e. unknown or missed genotypes) for certain bird-marker combinations. Because of that, we deleted more than 4,100 sample-locus combinations. In addition to the markers that initially failed at the validation step, we found a good number of 28 microsatellite markers that were used for genotyping but failed in all individuals. We deleted such entries from the entire dataset. After that, we had about 17,500 complete entries with both alleles available that were further used for the analysis within the condor genotyping project.

For several loci, our UCLA collaborators produced duplicated genotypes, probably because the initial genotyping did not result in convincing allele calls or amplification failed at all or because of improper handling of the genotyping data. For example, the original files contained duplicated genotyping data for the following loci:

|      |      |     |
|------|------|-----|
| 121A | 135A | 21A |
| 129H | 165A | 5A  |
| 130G | 18H  | 68A |

After removing all duplicated and failed genotypes, the data included 17,199 entries.

### 2.4. Third round

This round of the data processing involved a thorough double check of the entries for all possible errors. As a result, we obtained 17,178 datapoints for genotypes at 195 loci (SI S5). In addition, there were 121 loci excluded from the further analysis because these microsatellite markers failed at the validation step or in the course of actual genotyping. Table S1-1 shows the lists of such markers.

The previous estimate of 28 failed loci was corrected and reduced to 27 because one marker, 236G, was mislabeled and it was actually 236F that did not fail. There were few more examples of marker mislabeling when 23b should be 23Fb, 115A should be 115Aa, and GIS17 should be GIS17. One individual, #254, occurred 180 times in the dataset, although it was not included in the original genotyping population of 121 birds. Because there is no #264 in the data meaning that # 254 is a sample mislabeling case, #254 was changed for #264.

At few loci, there was just few entries obtained. For instance, at 130G locus the genotyping of all but one individual, #213, failed. For 56D locus, there were only four samples available.

The number of valid datapoints would probably be corrected, i.e. reduced, if some entries for descendants from certain parents have alleles that were miscalled or contained other errors and are not expected judging from the parental genotypes. Examples of such situations are described below.

## 2.5. Missing and miscalled allele data

There were situations when one of two alleles at a locus was questionable and marked with "?". Parents/offspring genotypes were used to figure out such uncertain allele as it was determined for example, for the condor #4 at 148A locus. However, it was sometimes impossible to identify an unknown allele as it was the case for #191 at 148A locus.

There were entries marked with two question marks ("? ?") for both alleles at one locus and for one bird, for example, #161 at 60A locus. Based on parental genotypes, we were able to determine that one of the alleles should be 179, while the other one could be 171 or 179 and was entered as 0. We had some other similar cases (e.g., #31 at 71Hb locus).

In few cases, the duplicated individual-locus combinations did not show the same alleles and were resolved by looking at parents' or offspring's alleles at that locus. For instance, individual #4 at 135A locus had two sets of data: 235/239 and 237/241. The #4 descendants, #23 and #27, had the 235/239 and 235/235 genotypes, respectively. This ruled out the 237/241 genotype for #4. Similar cases were: #103 at 129H (255/369); #146 at 129H (255/255); #183 at 129H (255/369); and #196 at 129H (255/255).

In some other cases, it was impossible to determine and confirm the right genotypes based on the closest relatives' genotypes, and they could doubtfully be used for the further analysis. For example, #196 at 135A locus had 235/239 or 239/239. Its parents, #25 and 37, had respectively 235/239 and 239/239. In this case, the genotype for #196 was left as 0/239 where 0 means an uncertain allele. Similar cases were: #195 at 121A; #203 at 129H; #88 at 135A; and #180 at 135A. Such data were deleted in the whole dataset.

At 165A locus, in addition to duplicated data, there was homozygosity, with only one allele, 189, present in the population. However, the "tail" of the samples, 235 to 2537, contained the 188 allele that looks improbable. They were changed for the 189 allele.

At 156A locus, in addition to duplicated data for the samples 235 to 2537 that were genotyped for "156a", there was a similar shift in allele calling. Instead of 225, 229 and 237, they had the 226, 230 and 238 alleles.

This was corrected. For #292, two sets of alleles were produced, 229/229 and 229/237, but the parents genotypes did not allow to figure out the exact genotype of the descendant.

A similar but more complicated situation was observed and corrected, where possible, for 5A locus (or “5a” as denoted in the duplicated cases) as can be seen in Table S1-3.

**Table S1-3.** An example of discrepancy in the allele calling data between chicks #235 to #2537 and their parents when genotyped for 5A locus.

| Chick # | Locus | Genotype | Parents           | Corrected |
|---------|-------|----------|-------------------|-----------|
| 235     | 5A    | 234/244  | 210/244 & 228/228 | 228/?     |
| 236     | 5A    | 234/244  | 210/236 & 228/244 | 236/244   |
| 236     | 5a    | 235/245  |                   |           |
| 237     | 5A    | 210/234  | 236/244 & 228/228 | 228/?     |
| 237     | 5a    | 249/249  |                   |           |
| 238     | 5A    | 210/210  | 210/228 & 210/228 | 210/210   |
| 238     | 5a    | 249/249  |                   |           |
| 241     | 5A    | 210/228  | 210/228 & 210/228 | 210/228   |
| 241     | 5a    | 249/249  |                   |           |
| 242     | 5A    | 210/244  | 236/244 & 228/228 | 228/?     |
| 242     | 5a    | 249/249  |                   |           |
| 243     | 5A    | 228/244  | 210/244 & 228/228 | 228/244   |
| 243     | 5a    | 249/249  |                   |           |
| 250     | 5A    | 228/228  | 210/228 & 210/228 | 228/228   |
| 250     | 5a    | 249/249  |                   |           |
| 251     | 5A    | 234/244  | 210/244 & 228/236 | 236/244   |
| 251     | 5a    | 235/245  |                   |           |
| 257     | 5a    | 227/245  | 210/244 & 228/228 | 228/244   |
| 257     | 5A    | 228/244  |                   |           |
| 264     | 5a    | 227/235  | 210/228 & 210/228 | ?         |
| 265     | 5a    | 227/247  | 236/244 & 228/228 | 228/244   |
| 265     | 5A    | 228/246  |                   |           |
| 270     | 5a    | 209/245  | 236/244 & 228/228 | 228/?     |
| 270     | 5A    | 210/244  |                   |           |
| 272     | 5a    | 209/209  | 210/228 & 210/228 | 210/210   |
| 272     | 5A    | 210/210  |                   |           |
| 280     | 5A    | 234/244  | 210/244 & 228/228 | 228/?     |
| 280     | 5a    | 235/245  |                   |           |
| 286     | 5a    | 227/235  | 210/236 & 228/244 | 228/236   |
| 286     | 5A    | 228/234  |                   |           |
| 292     | 5A    | 210/234  | 210/228 & 228/236 | 210/236   |
| 292     | 5a    | 235/235  |                   |           |
| 297     | 5a    | 209/227  | 210/244 & 228/228 | 210/228   |
| 297     | 5A    | 210/228  |                   |           |
| 309     | 5a    | 209/235  | 210/244 & 228/228 | 228/?     |
| 309     | 5A    | 210/234  |                   |           |
| 313     | 5A    | 228/234  | 210/228 & 228/236 | 228/236   |
| 332     | 5a    | 227/227  | 210/228 & 228/236 | 228/228   |
| 332     | 5A    | 228/228  |                   |           |
| 341     | 5a    | 209/227  | 210/228 & 210/228 | 210/228   |
| 1405    | 5A    | 210/228  | 210/236 & 228/236 | 210/228   |
| 2537    | 5a    | 227/235  | 210/236 & 228/236 | 228/236   |
| 2537    | 5A    | 228/234  |                   |           |

Overall, it was found that many loci had discrepancy and errors in allele calling for a subset of samples #235 to #2537 that is mentioned above as a “tail”.

In many cases, the data were produced for individuals #4 to #231 or #235 to #2537 but not for both subsets. For example, the genotype entries were only available for samples #4 to #231 at 111A locus, and for #235 to #2537 at loci 123A, 131A and 144A.

In terms of data incompleteness, we observe a range of one to 121 genotyped samples per locus. This variation of incomplete data for 195 filtered, validated and amplified loci (markers) can be seen in [Table S1-4](#).

**Table S1-4.** Numbers of condor individuals genotyped per locus.

| Marker | Genotyped samples | Marker        | Genotyped samples | Marker        | Genotyped samples | Marker           | Genotyped samples |
|--------|-------------------|---------------|-------------------|---------------|-------------------|------------------|-------------------|
| 130G   | 1                 | 58F           | 74                | 148A          | 103               | 176A             | 111               |
| 56D    | 4                 | 48G           | 75                | 30H           | 103               | 42Da             | 111               |
| 115F   | 18                | 112G          | 76                | 5A            | 103               | 51H              | 111               |
| 95A    | 18                | 20F           | 78                | 125D          | 104               | 81H              | 111               |
| 129A   | 19                | 86F           | 78                | 168G          | 104               | 85F              | 111               |
| 68F    | 21                | 65F           | 79                | 175Ab         | 104               | 100A             | 112               |
| 38H    | 21                | 188F          | 81                | 64G           | 105               | 151F             | 112               |
| 1A     | 22                | 134Ab         | 82                | 163Fa         | 105               | 156A             | 112               |
| 237F   | 22                | 23b           | 82                | 180G          | 105               | 105A             | 112               |
| 32F    | 22                | 257Fa         | 82                | 109G          | 105               | 125A             | 112               |
| 51G    | 22                | 25Hb          | 82                | 109D          | 106               | 157G             | 112               |
| 82D    | 22                | 101H          | 84                | 153A          | 106               | 21D              | 112               |
| 115Ab  | 22                | 233F          | 84                | 165F          | 106               | 81G              | 112               |
| 77A    | 23                | 142Hc         | 85                | 220F          | 106               | 92D              | 112               |
| 144A   | 24                | 103D          | 86                | 252F          | 106               | 110Ha            | 112               |
| 123A   | 24                | 124D          | 86                | 41A           | 106               | 11A              | 112               |
| 46A    | 24                | 145A          | 86                | 53A           | 106               | 174A             | 113               |
| 131A   | 25                | 60A           | 86                | CH262-184F1_2 | 106               | 42Db             | 113               |
| 157A   | 25                | 13Hc          | 87                | CH262-53D16_2 | 106               | CH262-13G5_2     | 113               |
| 49D    | 27                | 36D           | 87                | 115Aa         | 106               | 104D             | 114               |
| 236F   | 36                | 92H           | 87                | 133H          | 107               | 39D              | 114               |
| 82G    | 45                | 100F          | 88                | 116D          | 107               | 54G              | 114               |
| 182G   | 46                | 55A           | 88                | 143H          | 107               | 63G              | 114               |
| 58D    | 50                | 25Ha          | 89                | 30A           | 107               | 91A              | 114               |
| 167A   | 52                | 13Hb          | 91                | 68a           | 107               | 9A               | 114               |
| 33G    | 53                | 33A           | 91                | 73F           | 107               | CH262-184F6_1    | 114               |
| 21A    | 54                | 57D           | 91                | 132H          | 108               | 110A             | 114               |
| 97G    | 54                | 111H          | 91                | 120H          | 108               | 17H              | 115               |
| 150A   | 57                | 124H          | 92                | 154A          | 108               | 38F              | 115               |
| 153F   | 57                | 111A          | 92                | 157F          | 108               | 47G              | 115               |
| A8     | 57                | 27H           | 93                | 15A           | 108               | 58A              | 115               |
| C5     | 57                | 82F           | 93                | 21F           | 108               | 80A              | 115               |
| G8     | 57                | 253Fb         | 94                | 35F           | 108               | 135A             | 116               |
| H106   | 57                | 57H           | 94                | 51A           | 108               | 37H              | 116               |
| H3     | 57                | CH262-53D16_1 | 94                | 13Ha          | 109               | 52A              | 116               |
| A20    | 58                | 120A          | 96                | 198G          | 109               | 135H/CH262-154B5 | 117               |
| B7     | 58                | 94G           | 96                | 25Ga          | 109               | 66A              | 117               |
| D10    | 58                | 121H          | 98                | 35A           | 109               | Ch262-87L14_2    | 117               |
| D126   | 58                | 18H           | 98                | 37G           | 109               | GIS17            | 117               |
| D24    | 58                | CH262-21P20_2 | 98                | 39F           | 109               | CH262-87L14_1    | 117               |
| D6     | 58                | 120D          | 98                | 74F           | 109               | 125G             | 118               |
| D9     | 58                | 20D           | 99                | 116A          | 110               | 129H             | 118               |
| H115   | 58                | 75H           | 99                | 139H          | 110               | 9Fb              | 118               |
| H127   | 58                | 166F          | 100               | 186A          | 110               | CH262-13G5_1     | 118               |
| H238   | 58                | 192F          | 100               | 74H           | 110               | 111G             | 119               |



|              |    |             |     |             |     |             |     |
|--------------|----|-------------|-----|-------------|-----|-------------|-----|
| <i>H269</i>  | 58 | <i>121A</i> | 100 | <i>79H</i>  | 110 | <i>165A</i> | 119 |
| <i>H6</i>    | 58 | <i>56A</i>  | 101 | <i>106D</i> | 110 | <i>195F</i> | 121 |
| <i>17G</i>   | 70 | <i>195G</i> | 102 | <i>123H</i> | 111 | <i>98A</i>  | 121 |
| <i>142Ha</i> | 73 | <i>63H</i>  | 102 | <i>14A</i>  | 111 |             |     |

## 2.6. Evaluation of monomorphic vs. polymorphic loci

The genotyping results showed that in the resource population of 121 condors, there were multiple monomorphic loci. To keep track of how many they are, we screened the total dataset for observed number of alleles per locus. These data are summarized in [Table S1-5](#).

**Table S1-5.** Observed numbers of alleles per locus.

| Marker                  | No. of alleles | Marker               | No. of alleles | Marker      | No. of alleles | Marker       | No. of alleles |
|-------------------------|----------------|----------------------|----------------|-------------|----------------|--------------|----------------|
| <i>106D</i>             | 1              | <i>57H</i>           | 1              | <i>15A</i>  | 2              | <i>H106</i>  | 2              |
| <i>109G</i>             | 1              | <i>58D</i>           | 1              | <i>167A</i> | 2              | <i>H115</i>  | 2              |
| <i>110Ha</i>            | 1              | <i>64G</i>           | 1              | <i>174A</i> | 2              | <i>H127</i>  | 2              |
| <i>111G</i>             | 1              | <i>68a</i>           | 1              | <i>17G</i>  | 2              | <i>H238</i>  | 2              |
| <i>111H</i>             | 1              | <i>68F</i>           | 1              | <i>180G</i> | 2              | <i>H3</i>    | 2              |
| <i>115Ab</i>            | 1              | <i>75H</i>           | 1              | <i>192F</i> | 2              | <i>100A</i>  | 3              |
| <i>116A</i>             | 1              | <i>77A</i>           | 1              | <i>195F</i> | 2              | <i>101H</i>  | 3              |
| <i>116D</i>             | 1              | <i>80A</i>           | 1              | <i>1A</i>   | 2              | <i>109D</i>  | 3              |
| <i>121H</i>             | 1              | <i>81G</i>           | 1              | <i>21A</i>  | 2              | <i>125G</i>  | 3              |
| <i>124H</i>             | 1              | <i>81H</i>           | 1              | <i>21D</i>  | 2              | <i>132H</i>  | 3              |
| <i>125D</i>             | 1              | <i>82D</i>           | 1              | <i>21F</i>  | 2              | <i>134Ab</i> | 3              |
| <i>129A</i>             | 1              | <i>91A</i>           | 1              | <i>220F</i> | 2              | <i>144A</i>  | 3              |
| <i>130G</i>             | 1              | <i>92H</i>           | 1              | <i>233F</i> | 2              | <i>156A</i>  | 3              |
| <i>135H/CH262-154B5</i> | 1              | <i>CH262-13G5_2</i>  | 1              | <i>237F</i> | 2              | <i>157F</i>  | 3              |
| <i>139H</i>             | 1              | <i>CH262-184F1_2</i> | 1              | <i>23b</i>  | 2              | <i>165F</i>  | 3              |
| <i>13Ha</i>             | 1              | <i>CH262-184F6_1</i> | 1              | <i>252F</i> | 2              | <i>166F</i>  | 3              |
| <i>13Hb</i>             | 1              | <i>CH262-21P20_2</i> | 1              | <i>27H</i>  | 2              | <i>176A</i>  | 3              |
| <i>13Hc</i>             | 1              | <i>CH262-53D16_1</i> | 1              | <i>30A</i>  | 2              | <i>20D</i>   | 3              |
| <i>142Ha</i>            | 1              | <i>CH262-53D16_2</i> | 1              | <i>33A</i>  | 2              | <i>253Fb</i> | 3              |
| <i>142Hc</i>            | 1              | <i>CH262-87L14_1</i> | 1              | <i>35A</i>  | 2              | <i>32F</i>   | 3              |
| <i>150A</i>             | 1              | <i>GIS17</i>         | 1              | <i>35F</i>  | 2              | <i>38H</i>   | 3              |
| <i>153A</i>             | 1              | <i>188F</i>          | 1?             | <i>36D</i>  | 2              | <i>39F</i>   | 3              |
| <i>154A</i>             | 1              | <i>39D</i>           | 1 (2)          | <i>37G</i>  | 2              | <i>74H</i>   | 3              |
| <i>163Fa</i>            | 1              | <i>60A</i>           | 2?             | <i>38F</i>  | 2              | <i>79H</i>   | 3              |
| <i>165A</i>             | 1              | <i>100F</i>          | 2              | <i>47G</i>  | 2              | <i>85F</i>   | 3              |
| <i>168G</i>             | 1              | <i>104D</i>          | 2              | <i>51H</i>  | 2              | <i>94G</i>   | 3              |
| <i>175Ab</i>            | 1              | <i>105A</i>          | 2              | <i>54G</i>  | 2              | <i>97G</i>   | 3              |
| <i>17H</i>              | 1              | <i>110A</i>          | 2              | <i>56A</i>  | 2              | <i>C5</i>    | 3              |
| <i>182G</i>             | 1              | <i>111A</i>          | 2              | <i>57D</i>  | 2              | <i>D6</i>    | 3              |
| <i>18H</i>              | 1              | <i>112G</i>          | 2              | <i>58A</i>  | 2              | <i>D9</i>    | 3              |
| <i>195G</i>             | 1              | <i>115Aa</i>         | 2              | <i>58F</i>  | 2              | <i>H269</i>  | 3              |
| <i>198G</i>             | 1              | <i>115F</i>          | 2              | <i>63G</i>  | 2              | <i>H6</i>    | 3              |
| <i>20F</i>              | 1              | <i>11A</i>           | 2              | <i>63H</i>  | 2              | <i>103D</i>  | 4              |
| <i>236F</i>             | 1              | <i>120A</i>          | 2              | <i>65F</i>  | 2              | <i>121A</i>  | 4              |
| <i>257Fa</i>            | 1              | <i>120D</i>          | 2              | <i>66A</i>  | 2              | <i>133H</i>  | 4              |
| <i>25Ga</i>             | 1              | <i>120H</i>          | 2              | <i>73F</i>  | 2              | <i>186A</i>  | 4              |
| <i>25Ha</i>             | 1              | <i>123A</i>          | 2              | <i>82F</i>  | 2              | <i>41A</i>   | 4              |
| <i>25Hb</i>             | 1              | <i>123H</i>          | 2              | <i>86F</i>  | 2              | <i>46A</i>   | 4              |
| <i>30H</i>              | 1              | <i>124D</i>          | 2              | <i>95A</i>  | 2              | <i>5A</i>    | 4              |

|      |   |      |   |               |   |      |    |
|------|---|------|---|---------------|---|------|----|
| 33G  | 1 | 125A | 2 | 98A           | 2 | 92D  | 4  |
| 37H  | 1 | 129H | 2 | 9Fb           | 2 | A8   | 4  |
| 42Da | 1 | 131A | 2 | A20           | 2 | 151F | 5  |
| 48G  | 1 | 135A | 2 | B7            | 2 | 42Db | 5  |
| 51A  | 1 | 143H | 2 | CH262-13G5_1  | 2 | 82G  | 5  |
| 51G  | 1 | 145A | 2 | CH262-87L14_2 | 2 | 49D  | 5? |
| 52A  | 1 | 148A | 2 | D10           | 2 | 74F  | 6  |
| 53A  | 1 | 14A  | 2 | D126          | 2 | 157G | 7  |
| 55A  | 1 | 153F | 2 | D24           | 2 | 9A   | 8  |
| 56D  | 1 | 157A | 2 | G8            | 2 |      |    |

A total of 72 monomorphic loci were identified in this population. For the subsequent linkage analysis, they have no value and can be set aside.

### 3. Further planned steps

Because of the gaps in the data when we have zeros (i.e. unknown or missed genotypes) for certain bird-marker combinations, there is a need in analyzing such entries and attempting to identify likely genotypes for them based on known genotypes of their parents and/or descendants. We may proceed with that to get more rectified data with fewer gaps before doing next steps in the data analyses. Alternatively, we may just throw away such data. Additionally, there will be a need in identifying allele calling errors when genotypes of parents and offspring do not conform to each other.

The data obtained can be used in two ways—to analyze genetic variation within the current California condor population and to assess genetic linkage relationships between the markers used for genotyping.

#### 3.1. Genetic variation analysis

On the basis of the genotypes produced for 195 microsatellite loci, we can evaluate genetic diversity, heterozygosity, Hardy–Weinberg equilibrium model and other standard population genetic parameters. There are two options to do this estimation:

##### (a) Analysis of the identified full set of loci

At the moment, we have the list of 195 loci filtered as described above, and the appropriate whole dataset may be used for population genetic analyses.

However, if we look at available population genetic analysis programs (e.g., here: <http://www.biology.duke.edu/noorlab/software.htm>), it would be quite complicated to find an appropriate one and use it to treat the whole dataset for determining certain population/variation statistics. It is doubtful that any of these programs could handle such a huge data array. Another problem is multiple gaps we have. We already shortened the dataset by removing zeros and some questionable entries. The available programs do require entering zeros in the case of gaps at any locus. That means that it would be necessary to revert the data back to the original form. It might not be that easy to manipulate with a set of 17 to 25 thousand entries back and forth.

Also, if we undertake the full dataset analysis, it is even hard to imagine the size of an input file and the length of each row in it for the case of almost 200 loci. It is probably impossible to prepare a spreadsheet in Excel for such a long row, with up to 400 cells (200 loci by 2 alleles per individual).

### *(b) Analysis of the data subset*

As an alternative to the full dataset analysis, we may carry out a pilot analysis of approximately 20 loci. For this purpose, we would suggest the following. The plan was to genotype a resource population of 121 individuals for over 300 markers. About 100 markers were not validated and used for the actual genotyping. After removing additionally the failed markers, we still have a decent number of 195 genotyped loci that are either complete for every individual or incomplete to a different extent, which was observed in most cases. For population statistics, it seems reasonable to select randomly and use, say, 20 or so “good” loci with complete or mostly complete (e.g.,  $n \geq 110$  samples) genotyping data for the individuals studied. Moreover, such a reduced dataset would be better fitting the analyzing capacity of most known software programs, and it would be easier to handle it.

If we chose a subset of “good” and fairly complete data for a certain number of loci, this would, in our opinion, still provide us with a reliable estimate of population statistics for the whole set.

### *3.2. Linkage analysis*

For performing the two-point linkage analysis (SI S6), we used only 123 polymorphic loci excluding all monomorphic markers at the same time. The loci for which we obtained small numbers of genotypes should be discarded, as well. If we remove the data for loci genotyped, say, in less than 20 individuals, we will have 118 markers identified so far, which could be informative for the linkage analysis.

As a next planned step, we will complete the genetic linkage analysis with one of the available software packages, identify probable linkage groups, verify the marker order and play around with the LOD value. Also, we will look into a probability of linking the chondrodystrophy trait to any linkage group.
