# Supplementary material for: Towards a Genetic Linkage Map of the California Condor, an Endangered New World Vulture Species
Source: Animals (Basel). 2022 Nov 24;12(23):3266. doi: 10.3390/ani12233266 (PMC9739316; doi:10.3390/ani12233266)
Supplement: Supplementary file 1 [file animals-12-03266-s001.zip]

Archive with 6 entries (6 files):
- Supplementary Information S1 revised.pdf
- Supplementary Information S2 revised.xls
- Supplementary Information S3 revised.xls
- Supplementary Information S4 revised.xls
- Supplementary Information S5 revised.txt
- Supplementary Information S6 revised.pdf
