# Supplementary material for: Towards a Genetic Linkage Map of the California Condor, an Endangered New World Vulture Species
Source: Animals (Basel). 2022 Nov 24;12(23):3266. doi: 10.3390/ani12233266 (PMC9739316; doi:10.3390/ani12233266)
Supplement: Supplementary file 1 [file animals-12-03266-s001.zip › Supplementary Information S2 revised.xls]

## Sheet: Sheet1
Supplementary Information S2: Microsatellite marker and primer information for 296 loci
MS Marker	F Primer	R Primer		Non-validated		Failed Markers:
1A	ATGTTAGGAGCAGCCACCTC	ACAGCCCTGTCCGTGTC		102D		103A
2A	CAACAGTCTGGACCCGTAGC	CGCCCTCAGTAATTGGAAAA		104F		10Da
5A	TTTGTGAAGAATGGGAAAGC	TGCCTTTTTCTCCCCTCTTT		107A		110Hb
6A	GTTGGGCTGTGTCTTTTGGT	CAGGCCATGCTAATTGACAG		10Db		113H
8A	GGCAACGATTTCTGTTGGTT	GCATCTTCAAAGCCATAGCA		112A		142F
9A	GTGGCCGAACTGAAGTCCTA	GGGGAAGATGCTGAGTGTGT		114Ga		142Hb
11A	CACACGCTACAATCCCAAAA	GGGGCTCTGTAACATGGTTT		114Gb		147G
14A	CGGGGCATTCTGTAAGAAAC	ACCAGCTCACAGCCTCTCTG		114Ha		158F
15A	TCCTTTTTGCAGCAGGAGAG	GTGGAGGGAAGAGTCACTGC		114Hb		160Gb
21A	CGGGTTGACACCTTGTGTAG	TCGGTGTTGTCACTGTGGTT		116F		175Aa
30A	CTTTCCCATTTGCAGGTTCA	GGTATACATGGGGGCTGTTG		117A		234F
33A	TGCAAGCTAATTTTGCACGA	CAGGTTTCCAGAAGTCACTGG		117F		23Fa
35A	AATGGCACCCAAGATTTCTG	TTCCACTTGTCCACCTACCC		118D		244F
41A	ATGTTTTGCAGAAGGGGATG	CCACCTCCCTACCTCAGCTT		119A		253Fa
42A	TCCAGGCAACACAGAAACAG	CCTCGGGGCTGAGTATGTT		119H		25Gb
44A	TAGCTGTTCCTGGGTTTCCA	AGTATCTGGGGATCCAGTCG		128H		30Db
46A	CGTTCAACTAACGACGCAGA	CCGTCAAATACAGGGCTCAT		133A		40D
48A	ATGAAGAGCACTGCCAGACC	TGCATCTCTGCATGTTTGCT		133D		42F
51A	CGGGAACTGTTGCTGGTTAT	CTCATGGAGTGAGCTGCAAG		134Aa		52H
52A	TCCCAGCAATGGAAAAGCTA	TGCAAACAAACTCTGCTGCT		137Ha		53D
53A	CCACTGCACACAAAGAGGAG	GTGCGTGGGGATATGAAAAG		137Hb		57F
55A	TGTGTGAGACCAGGAGCAAG	TTCACGGACCTCACACTCAG		138A		60Hb
56A	TCTTGTCCGTGTAAAGCACTG	TGAAGCAGAGTTGCTGAGGA		13G		6A
58A	TCCCTTCCACACATCTGTCA	GGGAGCTCTGACCTGGACTA		140H		71Hb
60A	TCGCATTGTTTGTAGCGTTC	CAGCTCACCTCAAATGCTCA		144G		89H
66A	AAAGGTGCGTGGTTCTGG	CTGGGGTCACAAAGAGGTTC		148G		95F
67A	CTGCAGAAATTGAAATCAGAGG	TGCCACATGGGTAATGCTAA		14D		CH262-181F1_1
68A	ATAATGCAGGGCATGGAGAG	TTCTTTCACGCTGTTTGCAC		151Ga
77A	ATGTGCCCACAGGTATCTCC	CCTTTGCATTTGGAAACCAT		151Gb
80A	CAATTTATTCGCTGGGTGCT	AGCTGCAGCAGATCCACTTT		155A
91A	TCCATTCAGCAGGACACAAA	GCGGTGGCAAAATGTAAAAC		160Ga
95A	ATGGACTCAAAAGGGACGTG	CTGGCACACTGACGCAGA		160Gc
98A	TGGCACTGTGACTAAAGCAAA	TGAAAGGCAGTCAGCAGAGA		163Fb
100A	GTCATCCTCCTCCCTTCCTC	CCAGCATCATCAGTCACGTC		165G
103A	ACAGCAGGGCTGTGAAATCT	CCTGCCTCGTGTAGGATGAT		172A
105A	AGCTTAAACCCGTCGTGAGA	GGGGTTGATTATGCACAAGG		172F
107A	CCTATGGCATCAGCACCATT	CCCAGTGTGCATAAACACTCAT		173G
110A	ACACAAATGGCTGATTGCTG	GGCTGGATGAATTGGAGAGA		179G
111A	GAAAAGGAACCTGCCACTCA	AGTAAACGGCATGGCAACAT		180F
112A	TTGCTCGTGTTCCTCAACAG	GACTGGCAGGACAATCAGGT		181F
115Aa	CTCTGAGCCACTGGGAACAT	CCACACACACTGACCTCCAC		184F
115Ab	GGGAGGGCATGATGTGAA	ACAGCCCCTCACACCACA		185F
116A	ACTCGCTGCCCATTCTCTC	TCTGCTGTCTGCTTCGTTTG		18Ga
117A	CAGTTGTCTTGTTCACAGTGAGTG	AAACCTTTTTCTTTCTGGACCTG		18Gb
119A	CCAACTGTCAATCAGCAAGC	TGAAGAACCCTATAGAAATGTTGGA		18Gc
120A	TTGTGCCTGATTCCATGTTG	CTACACTCGGGCTCCTTCTG		190F
121A	CCTTCAGGAGGGATCTACAGAC	GGTTGTCTGTCCCAAAGAGC		199G
123A	CCATTCCTGCAACCAGTTTT	GCGCTGTGTAGGCTTTTGAT		200G
125A	TCTGTGTTTGGCACAGGAGA	GGTACAGACATGCCAAACCTC		201F
129A	GCCCAGAGAGACTGGAATGA	CCTTTGCCTGGAGAAATCTG		201G
131A	CAGCAAAGAGCCCTAACAGG	GTGCTTTGGGTGTGTCTTCA		205F
133A	GATTCATGGGCAGGAGAAAA	CTGAGTGGCAGGTGGTATCC		207F
134Aa	CTGCTGGAGGGATCCACCT	GGCCACACAGATCACAAACA		216F
134Ab	TCTTGTGGGTGCTCTGATTG	CGAGGCTGAAGATGAAGTCC		241F
135A	CCCAAAAACTGATGAACAACG	ACAGGACCTTCTATGCCAAA		257Fb
138A	CAGGAAAATCCTGTTCCTTACTG	TAGTCGGCACAGAGGTCCTT		29H
144A	TATCGGAGGGCAGAGGACTA	TGCCTTCACTACTAAATATGGCTTT		2A
145A	CCTCTGTGTGACACTGTGCT	GGGCTGTCATACACACATGG		30Da
148A	AAACAACGCAGCTCTTCAGG	CTAATGGTGGCACAGACAGG		35D
150A	AACCGCCAACGATAACAGTC	GTCACCTGCTTCCAAATGGT		36F
153A	CACTGCTGTGATGTGGTCCT	GCAGAGCTCTCCAAGTAAGCA		42A
154A	TGGTATGGTCCAGCAGACAG	CCTCCATGCATGTGTGAGTG		43D
155A	GAAGCTGGCACCTTTGTCTC	GGCGCTTAATGCACAAAACT		44A
156A	CATTTCGTGGAAGCCAAAAC	TCCTTTCCCTACAGCCCTTT		46D
157A	AAAACAGGGGAAGGCTCATT	CAAATGTGGCATGCTTTTGA		46F
165A	CATCCACAGGTCAAGGGTTT	TCCTGCCAAGAGGTCTCCTA		48A
167A	GAGCGATAAGCGGCTTGG	CACAGTGTCAGTGCCACACA		4D
172A	GACGTACTCCCACCAGGAGA	GCACAAGATGTGCAACAAAA		50D
174A	CTCCCACATCCATCCAAGTC	TACCCTTGAGCTCCAGCACT		53F
175Aa	CCTCAATTGCTGTTGCAGAA	CCTGACGTGATCTCCCTTTC		55D
175Ab	AGGGGATATGGCTGTCTGTG	GGTTCAACCTGTAGCGAAGC		60Ha
176A	TTTTTGGGGTCATTTTGGTC	AACATCCTCCTGGTGGAAAA		61D
186A	GCAGACCTGCTCTCATCACA	TCCCCAAAGAGCACAAACTC		61H
4D	CCTGGGTTGAAGCCATACTG	GAGGAGAGGATAGGAAGAGATCG		63F/CH262-21P20
10Da	TCACATCGATCCGATCACAC	AATGGCATGAACTGGAAAGG		67A
10Db	CCTTTCCAGTTCATGCCATT	TTGATCTGGAACGTGACTGC		71Ha
14D	TGGCAGTCTTTCCTCTTGTTG	TGGCGTCCAAAAGCTAAACT		76F
20D	ATGAGGCAGGAGTCTTGTGG	AAATGCCCCCTTCTGTCTCT		7H
21D	AAGCCCGGCAATGTTTACTA	CTGCCCCTCCAGGAAAAA		84Da
30Da	TGCAGGCATCAAGCTTATCA	CCAACTCGCTAACCCTGAAA		84Db
30Db	TTTCAGGGTTAGCGAGTTGG	GGCTTTCCTGAAGTCTGTGC		84F
35D	ATCCCCATGGCTGTAAATCA	TGCAATATGAAGCCATCAGTG		86H
36D	ATGCAGCCCATCCTTTGATA	AGCACCAATTTTCTGCAACC		8A
39D	CTGCGTGGTGCTTAGTTGC	CACCAGCTTTACAAAACCAGAA		93G
40D	GACGCGCTTTAAAAAGGAAA	CGCTCATCCTCTCACTCCTC		96F
42Da	TTGCCAAAAATCCCTCAGTC	ATGGGATGGGATCACAGAAT		9Fa
42Db	TCCCATCCCATGATACACCT	GTGGTGGCAGAAGACAGGAC		CH262-184F6_2
43D	TGTGACGGATCTCAAAGCAG	TTTCTGCCAAGGAAATGGAG		FhU2
46D	CCCACCTGTTTCATCCAACT	TCTCTTGGCTTTTGCTGTGA		GIS14
49D	ACAGCAGCCACAGCATTAAG	CTTCTCGGCGTGGTTTTC		GIS18a
50D	TGAGCTGTCCCTGTGTTCAG	GCCACAGCATAAGAGCAACA		GIS18b
53D	AGGAGGTATGTAGGAAGCAGGT	AACCTCATCCACCTCATGGT		GIS8
55D	TGGAGCTCTGTCCTGGAAAT	GCATGAAATGAAGGTGCAGA		HrU2
56D	AGAGCAGTGAAGGAGCAAGC	CCTTTTCTCTCCTTTGTTCACC		HrU6
57D	AAAGCTGCACTTTCCTTTGG	TTCAGAAAAGTGGCACAGGT
58D	CCTCCCCCTCCTTTTTGTTA	CAGGAATAGGAGGCTGTGAAA
61D	GATGAAGAGGCTAGAGGCTAGAGA	TATCCAGCTTCGCTCACTCA
82D	GGCATGCAAGCTTACAAGATA	CCTCCTCGTTGTCCTCTTCA
84Da	TGAGCATCACACATCTCTTGG	TGAGCTACCGTGATTCATGC
84Db	GCATGAATCACGGTAGCTCA	TCGTATAGCAGCTTCACAGTGTT
92D	CCGGAAACAGAAGAACTGGA	CCTTACAAGGCTGGCACAAT
102D	TTATGTTTCTGGGGGTCTGC	GGCGGGGAAATGTAGGTATT
103D	CCCATGGAATGGGAAAATAA	CATTTGCATCATGCTCAGGT
104D	TGCTCCCTACTTGGCTTGTT	GTGCAGCAGCAGGAAAATCT
106D	GGCGTAAGAGGCAATGAGAA	ACCTGCTTTGAGCTGCTGAT
109D	CGTGTCCTGCTGCATCTAAC	GAGGGAGAAAACAGGCAGTG
116D	GGAGAAGAAACCAGGAAGCA	ATGCTGAGGCAAGGCTATGT
118D	GGACACGGGGAAATTACTTG	CACGGAGCAGCAGAGAAAAT
120D	TGGGCACAATTCACCAAGTA	GCTGAGATTTCCTGGACCAA
124D	TGCAACCAACTGAAAATGGA	GCAATGGGAATGGCATAGAC
125D	CTTTCAACCAGCCAAGCATT	CTGAACCTGGGCTTGACCTA
133D	TTTCAGAATGTCCCAGAATGG	ATGGAGGGAATTCAGCACAG
9Fa	GGGAACAAAGGAGTGAGACG	AGCAGGAGACAACAGCAGGT
9Fb	TCGCCTTTTACTGCTGACTTC	AAGAGGAGGAGAGGCTACACG
20F	GGGGAGCCAGTTTTGTATTG	TCTGAAAAGGATTAGCTGCACA
21F	GGCTGAACCCTACTCTGTGTG	TTCAATTAGCCCTGACAGCA
23Fa	CCCAGCCAGGAGACTGTAAA	TTCTTTGTCTTCTTTGCCTTCA
23b	TGAAGGCAAAGAAGACAAAGAA	CCAGAAAATGGCTTTGCCTA
32F	GCATGCTTTCTTCCCAGAAC	GTTGCTGCAAATTCTGTCCA
35F	ACCTCCCACCTACCCAAAAG	CATAGAGGCAGGGAAACCAA
36F	TCTGCTAACTTGTGACTTCCTCA	AGCTGACACAATGGATGCAC
38F	CACCGGACAACAGCATGA	CTTTTCGCTTTCCTCCTCCT
39F	GAAGGAGCCACTGGAGTGAT	TACCAAAGGGCTTTTGTGCT
42F	CTTTCCTCCCTCCAGCAG	CCGTAAATTCACTGGGAGGA
46F	TCCTCCCTTTTTAGCCTTCTG	AACGTATACGCAGCTTCAGGA
53F	CAATTGCATTGGGCATCC	TCTTCCTATCTTTTCTTCTTCCTCTC
57F	GATGAAGAGGCTAGAGGCTAGAGA	AGCAGCTTCTGCTCACTCAC
58F	TGCAGGGAGGCATTAGAAGT	ACGTGTGGCAAAATTCCTTC
63F/CH262-21P20	GCAGAGAGTTTCTCCTTTTGC	TGGAACAAAACAAACACCACA
65F	GCCTCAGGGAGAGAGGAAAG	AAGAAGGCAGCTCCACAGAG
68F	TCTGGCAGAACTAATGTTCTTGA	CCCCCTTTTGGTTATATTCCTT
73F	GTGCTGGCTCCAGATTATCC	TTGCCGATTCATTTTTGTCA
74F	CCTAAAACAATGGCAGGGACT	GGGCCTGGATGGTTAAAGTT
76F	ATCTTACTGCCGGGACTCCT	CAGCTCAGCACGGCTCTG
82F	TCCCCCATGTTCTCTCTGAC	ACTCACCGCTTCCATAGGTG
84F	TCAGGAAAAGCAGCATGAATC	TTTAGCTGAACTGGCGGTTT
85F	CTGACGGGAGGTTTGAAAAG	GCCTTACCCCATGAACAAGA
86F	CCCTTGTAATCAGAGGGGAAA	ACGAGATTCGGTGACAGTGA
95F	ACCTGGAGGACATTGCTGAT	AAACTAAGCCCTCCCCAACT
96F	GCTTGAGAGTCTATTGAATGAGGTC	TGACCGTTCGATTCCTGAG
100F	AGGGACTGTGCTGGAATCAT	GACCAAGGGATGCACATTTC
104F	AGGTAGGGGGAAGAACAAGG	CTACCCACTCCAGTGCCATT
115F	TGCTCTGGTCAGATCTGTTGTT	ATAAACGAGGGGGAAAGCTG
116F	CAGCCTCCTCCTGAAAGAAA	TTTTCTTGGGTTTATTTCTCTTTTT
117F	CCAGGATGCTTGGTTTTCAG	GAGGAGTTGTCTGGGAGGAA
142F	GGAATCTCTCCAGTCGATGC	GTCCCTCTCTTTTCCCCAAG
151F	GCTTCTCCAGAGAGCTCCAA	GCTCTTCAGCAGCTTTTGCT
153F	GGACAGAGGGATAAAGGCAGA	GCATCCCTCATTGTCTCTCC
157F	TGTCCATAACCTCAGGCAGA	AAGTGTTCCCAGTTGCCAAG
158F	ACATAAAAGCTGCCCTGTCC	GAGGGTGGATCGCTGCTC
163Fa	CCTCCCCCTCCTTTTTGTTA	AAGATCATTTTCTCAGGTCTCTGG
163Fb	TCTGCTACTGATGGCACGTC	AGCAGGTTTTCAGCCAGCTA
165F	GGTGTATCTATTCACGTAATCTTGTG	ATGAGGGTCTGATGGCAAAC
166F	CTGCAACCAAGATGCAAAAA	GGTTTGGTTGAATAAAGGTCCA
172F	AGTCAGGTGTTGGGGAAGG	TAGCAGTTCAGGAGGGGTTG
180F	GGGCTGCTTATGTGTTTTAGG	TGAACGTATAGCAGCTTCAGGA
181F	CAAATGGCCTTCTCCTGATT	GGGACATCACTTCAGCCTGT
184F	GCATGCAGCTTCCAGGAG	GATGGTGCCCATGTAGCTCT
185F	TGAGAGGTTCAGAGGTCTTGC	CTAGGCATTTCCTCCACAGG
188F	ACCGTGAAGTCTCCATCTGC	CACACCCATACCCCAAAAAC
190F	CGGACCGGGATCTCTACAGT	ACTTGGGTTGGCTTGGTATG
192F	ATGGGGTCAATTTTGATTTTT	TTCCTTTTGTTGTTGTTTGTTTG
195F	AACCTGGGTTTGAGTCATCG	ATGGTGCTGTGAAACTGTGC
201F	TTCTACGGAGGGAACAAGGA	AAAGGCAGCACCGGACAG
205F	AGAGGATGCAGTTGTGTGAGAA	CACAGAAATGCACGGTGTTT
207F	GATGTGATCTGGCTGCAGAA	CGACGGCATTGTGAATCTTA
216F	ACGTACCAGCTCTGGGGTA	GCAGCAGAGTTAGGCACAAA
220F	GACCCCAAGCTCACTGAAAC	CACCTGCCTCCCAAGAGTTA
233F	TTGGAACATGCACAACAGGT	TGGCTGGAGCTCTCTTCACT
234F	TCTACATCGCTGCTTTTGTGA	CGTATCAGCAGCTTCAAAGG
236F	GAAACTGTTGGAGGCGTCAG	GCTCCCTGCCCATATTCTTA
237F	TTTTGTCCTGCTGACTCCTC	ACAGCATAAGGAGGGGGAAT
241F	ACCTTGGGATGCAGAATGAC	ACAGTCCATCCCTTCACCAC
244F	GATTAGCATTACTATCAGAACGTAGC	AAGACTCAGGTAATTTTACAGTCAAGC
252F	GGCATAGTCAGAGGCAGCTC	TGGTTCCCTGATTGATGTGA
253Fa	TGTACCAATTTATTGGAAGAAACAA	CAACCTTCTCAAACATCATAAACTG
253Fb	TGTGCTGAACACTCAACAGAGA	TGGCTTCGAGGAGTCTATCAA
257Fa	ATGGGTGTTTTGGAGCTTTG	AGGAGAAAGAGGAGCCAAGG
257Fb	CCTTGGCTCCTCTTTCTCCT	CGTGGTTTTGGGCAATATCT
13G	AGAACTTTGTCAGTGTTGTGCAG	CCTGACCAAACTTTTAGGCATT
17G	GCTGTCACAGGCTCCAGAC	GGAAACCCCCTGCATCTG
18Ga	TGCTGACCAAGTTTTTGTTGTT	GCTTGTGCTGTGCTGTTTTC
18Gb	AACGCAAAGGCATAAAGCAA	TCACTCTGTTTCGGTCGTTG
18Gc	AGCAACGACCGAAACAGAGT	CAGCCAGCCTTCTGTTGTCT
25Ga	TCTGAAGTGGCAGTGGAGTG	CAAGACTGGAAGGCCAATGT
25Gb	CAGTGTGCCAAGCCAAAGTA	GAGGCAGAGTGGAAGACGAC
33G	AGGGCATGTGCATTAAAAGG	TTCAAAGGCTTGTCCATGTG
37G	TTGAAATGGGTACAGGCACA	TGCATGCCTATTTCAAAAGAGTT
47G	GAACCAGAAAAATGCCAGGA	GCACAGGAACAAAAACCACA
48G	TCGTATGCTTACCCCAAAGC	GACACACAGCCTGGACTTCA
51G	CAGCATATAAAAGCCCTTCCA	GTTGGAGAATGGGATCATGG
54G	TTCAAAACTGCAAAGGGTTG	TCAATTGTGCCAGAACAGGA
63G	CCTGGAAAAAGTGTGCTTCTG	GGCAGGAGGGAGGAAAATAG
64G	GCCTAAGCATCCAAACCAAC	ACCTGGAGAGGAGCTGTGAA
81G	GCATCATGAGGACAGCAAAG	AAGGAAAGTTGCCAAAGCAG
82G	TTGCATTTGACAGCTTGCTT	TAGACCTGCCAGCATGAAAA
93G	TCGCACAAGATCACACTTGC	TGTGAGGTGAGAGTGAGAGCA
94G	GGGGAAGAAAGAGTCCTGAGA	TCCTCATCTTCTGCCACCTT
97G	GGTAACCCTGGAAGCACAAG	TGACTAAACTGTTGGGGGAAT
109G	CTTCAATGCCCCAGTTGTTT	AAATGCAAGCATGGGTTTTT
111G	CCTGCTGGTTAAAGCTACCC	GTAGCGCAAGTCCATGACAA
112G	AAAGACTCAAATCCCCCACA	AGCCCCTTTTGGTGCTAGAT
114Ga	CCGAAAACGATGACAATCCT	AACGAGACTAGTGAGCGTAGGT
114Gb	TATATTGCCGTCCGTCACTG	TGAATGTTGGTAATGATTGTTGTG
125G	GCCTATCATTTAGGCACAGAGA	GCCTGGGTATTCAGATGGAA
130G	AGCTTCCTCGGTAGGGAAAA	CACCGGACAACAGCATGA
144G	CAAGCGTGACAGCACATTCT	TGAAATGTCAAATTTATGATACAACA
147G	CGGACAACGGCATGTTGAT	CAGCTTCTCAGTAGGAACAAAGG
148G	TCTCCAGTTTGCACTGGTTG	TCTGCGCTGGTGTAAATCAC
151Ga	TGGACGAGACACGACGATTA	TCGAGTGTCACGTCTACTAGGG
151Gb	AGACGTGACACTCGACGAAC	AGCGAGTTAGTGTCCGTGGT
157G	TCAATAATAACAGGAAGCAAGTGG	TGCCTTCATTCCTGGAAGTC
160Ga	AACCTCAGCATTACCAGCAA	CTGTGCACTGCAAATGTGTG
160Gb	GCAGCCAGTGCACACATTT	ACTGTGCTGCTGTGCTGTG
160Gc	ACAGCACAGCAGCACAGTTC	AAGCTTTCCCTGCCTTTCTC
165G	ATCATCCCTCCCCAGAAAAG	GTGCAGTTCCCTGTCCTGTC
168G	CTGCACATGGGCCTAAAAGT	TCATCCGCTGTGTAGAGCAC
173G	CTGCTCCTGTTTCTGCCTTT	GTGGGGACACGCCATACT
179G	AGCAGCTTCCCCTCTCTTTC	GTGACAGCGAGCAAGACAAA
180G	TGACACAATACATTCCAAGCAA	TTGGTACGTGCTGCAGTTTT
182G	AGAGCAGTGAAGGAGCAAGC	CCTTTTCTCTCCTTTGTTCACC
195G	CCTGGCTGCTGCAGATTACT	AGGGACACGTGAACAGAACA
198G	ACTGGCTGCAGGTAAAACCA	AGTAGCCCTGAAGCCAACCT
199G	TTCAACAGGAGGAAACAGGAG	TCCTCCTCTTCTTCACATTATTCC
200G	AGCTCAAGCATGCTGACAAA	TTGCAGGCAAGAATTGACAC
201G	CCACCTCATGCTGAAGTCTC	CTCTGATCAGGGGAGGGATA
7H	GTGACAGCGAGCAAGACAAA	TTCCCCACCAATTTCTTCTG
13Ha	TCATGGGCAATGAGAACATC	CTATCCATCCGATCCTCTGC
13Hb	CGAATATATGACTGGGGCAAG	TTTTTCTATACAACCTACGCTCAG
13Hc	CTGAGCGTAGGTTGTATAGAAAAA	TGACATGAGGGTCTGTGAGC
17H	TTTCCGGAGGAGTACAATCG	CCAGAACCACATTTGGATGG
18H	GCAAAATGGTCCAGAAGACC	CAAGCTGCTGATGGAAACAA
25Ha	CTGCTAGGGCCTTCCTTTCT	GTTTGTCAGTGGATGCATGG
25Hb	CCATGCATCCACTGACAAAC	CACACACCGTACCCCTGAG
27H	TCAGTGGAGAGCGATGTGAC	CAAGGCACCATCCTCCAATA
29H	GATGCCATTTGGCAGATAAGA	GCTCTCCCCAGTTCAATCAG
30H	GGAGCAATGGATGTTTCGAT	ATTGCAGACCACCAGAAAGG
37H	TCAAAGGAAGCGACCTGTCT	TGTGAGGTTAGCTGCAGATTG
38H	TTGTCCTGATGGCTCCAAGT	GGTACAGATGCACCCCTTGA
51H	CCATCATTTAAAAGACAGCCAAT	CCGTACGAATGCAGATTTGA
52H	GATTCCTCATTTGGGCTGAA	AGGAGGTCTGGCTGGAGAAT
57H	TGAAGGAGGAGGCTGTGTTT	GGCTTGCCCTTTTGAACATA
60Ha	TCCATCATCCGTGGTAACAA	TTGAGTGGAGTGATTTGAATGG
60Hb	CCATTCAAATCACTCCACTCAA	CCTGATTGCACCTGTCACTG
61H	CACCACCCCAGACATGTTAAG	AGGAACGGAAATACAGAAGGA
63H	CAGACCGAGCTGGTGATTCT	CTGCAGTCTGGCGTCATAAG
71Ha	TCTCCTGCAGCTGACTATGC	CACTGCGCTGCAATGTGT
71Hb	ACAACACCAGCGCAGTGA	GGCTTGTCCTCGTGTCTGAT
74H	TCCCTTTAGACAGGCAGCAC	AGTACCCTGCCCTTTGTCCT
75H	CCCCTGGACAGTGGAATTTA	GGCTTCTGCTGATGAAGGAC
79H	AAACGGGAAATGGATGGAAG	AGGACATTTTGCGGACAGAC
81H	ACGGAAGAAGTGCTGAAGGA	TTGGCACCTTGAGTGTGAAG
86H	GACGCGCTTTAAAAAGGAAA	CTCCTCTTCTCGTCTGTGCTC
89H	CACCTCTCTGTCCTGCTCTG	CAGGACACGTGGTATGGAGA
92H	TTTTCACTTCTACCCTTGTCCA	GAGCACAAAATGCCAGTGAA
101H	CGTGTACACCTGCCTTTCCT	ATGGAGAGATGGGATGCAAG
110Ha	CGTGAGAGTACGATGACAAGGA	GCCTTTTACTGCTGCCTTCA
110Hb	GGAGACAACAGCAGGTGGAT	GCAGCTTCTAGGGAGGGAAC
111H	CAAAGCTCAGGGGATCATGT	TGGGAGCTATCTTGCTGGAC
113H	CCCCAGTTGCCAAACATATC	TCTGAAAAAGAGGCAAAGACAA
114Ha	GCCTGACACCTGAAGGTACTG	TGGGGAAAGCTTAACTTGGA
114Hb	TGCCAGAAAGCTCATAAGGAA	GAGGGATGCAAGGATAACGA
119H	CAGCACCTAGCTGCAGTGAC	ATGTGCTTTCCTGCTCCACT
120H	TTTGAAAGTGGGTGTGAGGA	CACTCCTCTAAACCCGGAGA
121H	TGTTTTGGCTTTTCCTTTGC	CTCATTCGGCTTGGAAAGAT
123H	GCAGAGGCTGGAGGTAACAC	CCATGAGTTGTTTGGGATGG
124H	CAGCACTGGAGGGTCAAAGT	ATGAGTCAGAGCAGGGGAGA
128H	ATCCTTCCCTCACTCCCTTC	TGGGAGCCTCAGGTAAAGAA
129H	TCCTTGCTGGACTGACCTCT	AACTGGTCCGTCGATAGTGG
132H	GAGCTTTCCAGACGTTGAGG	GATGCAAGAAAAGCGACACA
133H	CAGAAATGCGCTTTGTGTGT	GCCTGTTGGGATGACTCCTA
135H/CH262-154B5	AAGCAGAGTTTGCTGCGAAT	GGAGAAAGGCATTTGGAGTG
137Ha	AGCAGTGCTGGGTTAGCTC	TGCATCAGAAATCTCTCTCTTCC
137Hb	TGACGTCCACCTTGTGATGT	CCCAAGAAGGGTGAAAAGTG
139H	CTTGCTTCCAACCGATTTGT	CTCGTTCTCAGCCTTCATCC
140H	GTCCAGGGTCTGCCCTTC	AGTGCTCTGTGGTGGCTCTT
142Ha	TTTGGCATTCAGGTGGTGTA	GAGCCTAAAAGGCATGTTGC
142Hb	ATGGAGAGATGGGATGCAAG	CGTGTACACCTGCCTTTCCT
142Hc	CGTATTGCCAATCAGGTCAC	TTGCGTGTGAATACACAGAGG
143H	AAGAAAGGGGAAACAAAACAAA	TATATCATGGCAACCCAGCA
GIS8	AAGCTTCTGCAACAGGGAAG	GCGTAGGCAAGGTCAGAGAG
GIS14	TTGTCCCAGTGTTAGGAAAGG	AGCCAGGTGAAGGTCTCAAA
GIS17	ACCAGCTTGGTGACTTTTGG	AAGCCATGTTTGGGAGAGTG
GIS18a	AGGTCTCAGCCTGCAGCTTT	CTCCTTCTTTCTCGGCAGTG
GIS18b	GGAAAAGGCAAAGATCACCA	ACAAGTTTGCCTTCCTGCAC
CH262-13G5_1	GTTCGTCCCCCTCATTTCTT	GGCGGCTTAGATGTGCAG
CH262-13G5_2	GATGAGGGCTTCACTGGGTA	CCCCCTTATATCAGCACACC
CH262-21P20_2	ACATCTGCAGAGCAGGGACT	GGCCTAGCAACAGCCTTTTC
CH262-53D16_1	CACCAGGCAGAGAAAAACCT	GCTGCTGCTCCCTCAGATAA
CH262-53D16_2	GTGCTCCTTTCCTTCAGTCG	CACCCTGCAGAGAAAATAACAA
CH262-87L14_1	ATGAGCCCACCTCAGTTCAG	CCCTTTTTAAGCCAGTGCAG
CH262-87L14_2	TCTTCTGCATCGCTGTGTTC	TCCCTGTCAGCTTACACTGCT
CH262-181F1_1	TTCACCTGCAGCAAGAAATG	ACTGCCTGGAAAGGTTAGGG
CH262-181F1_2	TGGGGAACCTGCATTTTTAC	GGATTGTTATCCCCACATGC
CH262-184F6_1	CAGGTGCCTTGAGCTCTCTT	ATGTTGGGCTTCTCTTTCCA
CH262-184F6_2	AAGAGAGCAGGATCGCTGAG	CTGCTGCTTGGCATCTGTTA
FhU2
HrU2
A8
A20
B7
C5
D6
D9
D10
D24
D126
G8
H3
H6
H106
H115
H127
H238
H269
