# Supplementary material for: Towards a Genetic Linkage Map of the California Condor, an Endangered New World Vulture Species
Source: Animals (Basel). 2022 Nov 24;12(23):3266. doi: 10.3390/ani12233266 (PMC9739316; doi:10.3390/ani12233266)
Supplement: Supplementary file 1 [file animals-12-03266-s001.zip › Supplementary Information S3 revised.xls]

## Sheet: Sheet1
Supplementary Information S3: Microsatellite marker and primer specifications for 316 loci
Locus	Forward Primer	Reverse Primer	GenBank #	Primer Tm Range	Product Size
1A	TGTAAAACGACGGCCAGTATGTTAGGAGCAGCCACCTC	ACAGCCCTGTCCGTGTC	DQ483109	59.31-59.67	181
2A	TGTAAAACGACGGCCAGTCAACAGTCTGGACCCGTAGC	CGCCCTCAGTAATTGGAAAA	DQ483110	60.71-60.07	202
5A	TGTAAAACGACGGCCAGTTTTGTGAAGAATGGGAAAGC	TGCCTTTTTCTCCCCTCTTT	DQ483113	57.79-60.18	187
6A	TGTAAAACGACGGCCAGTGTTGGGCTGTGTCTTTTGGT	CAGGCCATGCTAATTGACAG	DQ483114	60.01-59.30	197
8A	TGTAAAACGACGGCCAGTGGCAACGATTTCTGTTGGTT	GCATCTTCAAAGCCATAGCA	DQ483116	59.98-59.02	239
9A	TGTAAAACGACGGCCAGTGTGGCCGAACTGAAGTCCTA	GGGGAAGATGCTGAGTGTGT	DQ483117	60.25-60.12	195
11A	TGTAAAACGACGGCCAGTCACACGCTACAATCCCAAAA	GGGGCTCTGTAACATGGTTT	DQ483119	59.58-58.91	219
14A	TGTAAAACGACGGCCAGTCGGGGCATTCTGTAAGAAAC	ACCAGCTCACAGCCTCTCTG	DQ483122	59.57-60.76	237
15A	TGTAAAACGACGGCCAGTTCCTTTTTGCAGCAGGAGAG	GTGGAGGGAAGAGTCACTGC	DQ483123	60.65-59.84	241
21A	TGTAAAACGACGGCCAGTCGGGTTGACACCTTGTGTAG	TCGGTGTTGTCACTGTGGTT	DQ483129	59.06-60.05	165
30A	TGTAAAACGACGGCCAGTCTTTCCCATTTGCAGGTTCA	GGTATACATGGGGGCTGTTG	DQ483138	61.00-60.07	152
33A	TGTAAAACGACGGCCAGTTGCAAGCTAATTTTGCACGA	CAGGTTTCCAGAAGTCACTGG	DQ483141	60.53-59.75	163
35A	TGTAAAACGACGGCCAGTAATGGCACCCAAGATTTCTG	TTCCACTTGTCCACCTACCC	DQ483143	59.93-59.82	183
41A	TGTAAAACGACGGCCAGTATGTTTTGCAGAAGGGGATG	CCACCTCCCTACCTCAGCTT	DQ483149	59.93-60.64	171
42A	TGTAAAACGACGGCCAGTTCCAGGCAACACAGAAACAG	CCTCGGGGCTGAGTATGTT	DQ483150	59.87-60.08	178
44A	TGTAAAACGACGGCCAGTTAGCTGTTCCTGGGTTTCCA	AGTATCTGGGGATCCAGTCG	DQ483152	60.63-58.97	237
46A	TGTAAAACGACGGCCAGTCGTTCAACTAACGACGCAGA	CCGTCAAATACAGGGCTCAT	DQ483154	60.05-59.96	191
48A	TGTAAAACGACGGCCAGTATGAAGAGCACTGCCAGACC	TGCATCTCTGCATGTTTGCT	DQ483156	60.42-60.57	173
51A	TGTAAAACGACGGCCAGTCGGGAACTGTTGCTGGTTAT	CTCATGGAGTGAGCTGCAAG	DQ483159	59.99-59.73	160
52A	TGTAAAACGACGGCCAGTTCCCAGCAATGGAAAAGCTA	TGCAAACAAACTCTGCTGCT	DQ483160	60.71-59.79	170
53A	TGTAAAACGACGGCCAGTCCACTGCACACAAAGAGGAG	GTGCGTGGGGATATGAAAAG	DQ483161	59.46-60.33	249
55A	TGTAAAACGACGGCCAGTTGTGTGAGACCAGGAGCAAG	TTCACGGACCTCACACTCAG	DQ483163	60.02-59.86	193
56A	TGTAAAACGACGGCCAGTTCTTGTCCGTGTAAAGCACTG	TGAAGCAGAGTTGCTGAGGA	DQ483164	58.99-59.86	178
58A	TGTAAAACGACGGCCAGTTCCCTTCCACACATCTGTCA	GGGAGCTCTGACCTGGACTA	DQ483166	60.09-59.40	230
60A	TGTAAAACGACGGCCAGTTCGCATTGTTTGTAGCGTTC	CAGCTCACCTCAAATGCTCA	DQ483168	59.88-60.14	159
66A	TGTAAAACGACGGCCAGTAAAGGTGCGTGGTTCTGG	CTGGGGTCACAAAGAGGTTC	DQ483174	59.68-59.55	172
67A	TGTAAAACGACGGCCAGTCTGCAGAAATTGAAATCAGAGG	TGCCACATGGGTAATGCTAA	DQ483175	58.97-59.95	227
68A	TGTAAAACGACGGCCAGTATAATGCAGGGCATGGAGAG	TTCTTTCACGCTGTTTGCAC	DQ483176	60.06-60.03	233
77A	TGTAAAACGACGGCCAGTATGTGCCCACAGGTATCTCC	CCTTTGCATTTGGAAACCAT	DQ483185	59.81-59.80	161
80A	TGTAAAACGACGGCCAGTCAATTTATTCGCTGGGTGCT	AGCTGCAGCAGATCCACTTT	DQ483188	60.10-60.16	171
91A	TGTAAAACGACGGCCAGTTCCATTCAGCAGGACACAAA	GCGGTGGCAAAATGTAAAAC	DQ483199	60.24-60.36	194
95A	TGTAAAACGACGGCCAGTATGGACTCAAAAGGGACGTG	CTGGCACACTGACGCAGA	DQ483203	59.97-60.81	229
98A	TGTAAAACGACGGCCAGTTGGCACTGTGACTAAAGCAAA	TGAAAGGCAGTCAGCAGAGA	DQ483206	59.52-59.86	247
100A	TGTAAAACGACGGCCAGTGTCATCCTCCTCCCTTCCTC	CCAGCATCATCAGTCACGTC	DQ483208	60.01-60.28	228
103A	TGTAAAACGACGGCCAGTACAGCAGGGCTGTGAAATCT	CCTGCCTCGTGTAGGATGAT	DQ483211	59.87-60.10	214
105A	TGTAAAACGACGGCCAGTAGCTTAAACCCGTCGTGAGA	GGGGTTGATTATGCACAAGG	DQ483213	59.88-60.19	211
107A	TGTAAAACGACGGCCAGTCCTATGGCATCAGCACCATT	CCCAGTGTGCATAAACACTCAT	DQ483215	60.88-59.92	246
110A	TGTAAAACGACGGCCAGTACACAAATGGCTGATTGCTG	GGCTGGATGAATTGGAGAGA	DQ483218	59.72-60.16	190
111A	TGTAAAACGACGGCCAGTGAAAAGGAACCTGCCACTCA	AGTAAACGGCATGGCAACAT	DQ483219	60.23-60.39	151
112A	TGTAAAACGACGGCCAGTTTGCTCGTGTTCCTCAACAG	GACTGGCAGGACAATCAGGT	DQ483220	60.02-60.12	198
115Aa	TGTAAAACGACGGCCAGTCTCTGAGCCACTGGGAACAT	CCACACACACTGACCTCCAC	DQ483223	60.26-60.05	283
115Ab	TGTAAAACGACGGCCAGTGGGAGGGCATGATGTGAA	ACAGCCCCTCACACCACA	DQ483223	60.43-61.22	231
116A	TGTAAAACGACGGCCAGTACTCGCTGCCCATTCTCTC	TCTGCTGTCTGCTTCGTTTG	DQ483224	60.51-60.32	222
117A	TGTAAAACGACGGCCAGTCAGTTGTCTTGTTCACAGTGAGTG	AAACCTTTTTCTTTCTGGACCTG	DQ483225	59.91-60.02	204
119A	TGTAAAACGACGGCCAGTCCAACTGTCAATCAGCAAGC	TGAAGAACCCTATAGAAATGTTGGA	DQ483227	59.45-60.23	249
120A	TGTAAAACGACGGCCAGTTTGTGCCTGATTCCATGTTG	CTACACTCGGGCTCCTTCTG	DQ483228	60.52-60.01	162
121A	TGTAAAACGACGGCCAGTCCTTCAGGAGGGATCTACAGAC	GGTTGTCTGTCCCAAAGAGC	DQ483229	59.21-59.70	209
123A	TGTAAAACGACGGCCAGTCCATTCCTGCAACCAGTTTT	GCGCTGTGTAGGCTTTTGAT	DQ483231	59.97-60.42	230
125A	TGTAAAACGACGGCCAGTTCTGTGTTTGGCACAGGAGA	GGTACAGACATGCCAAACCTC	DQ483233	60.44-59.47	167
129A	TGTAAAACGACGGCCAGTGCCCAGAGAGACTGGAATGA	CCTTTGCCTGGAGAAATCTG	DQ483237	60.35-59.81	105
131A	TGTAAAACGACGGCCAGTCAGCAAAGAGCCCTAACAGG	GTGCTTTGGGTGTGTCTTCA	DQ483239	60.01-59.73	194
133A	TGTAAAACGACGGCCAGTGATTCATGGGCAGGAGAAAA	CTGAGTGGCAGGTGGTATCC	DQ483241	60.01- 60.53	178
134Aa	TGTAAAACGACGGCCAGTCTGCTGGAGGGATCCACCT	GGCCACACAGATCACAAACA	DQ483242	62.59-60.58	167
134Ab	TGTAAAACGACGGCCAGTTCTTGTGGGTGCTCTGATTG	CGAGGCTGAAGATGAAGTCC	DQ483242	59.83-59.95	160
135A	TGTAAAACGACGGCCAGTCCCAAAAACTGATGAACAACG	ACAGGACCTTCTATGCCAAA	DQ483243	60.38-57.27	226
138A	TGTAAAACGACGGCCAGTCAGGAAAATCCTGTTCCTTACTG	TAGTCGGCACAGAGGTCCTT	DQ483246	59.18-59.87	201
144A	TGTAAAACGACGGCCAGTTATCGGAGGGCAGAGGACTA	TGCCTTCACTACTAAATATGGCTTT	DQ483252	59.79-59.64	220
145A	TGTAAAACGACGGCCAGTCCTCTGTGTGACACTGTGCT	GGGCTGTCATACACACATGG	DQ483253	57.32-59.84	238
148A	TGTAAAACGACGGCCAGTAAACAACGCAGCTCTTCAGG	CTAATGGTGGCACAGACAGG	DQ483256	60.57-59.16	218
150A	TGTAAAACGACGGCCAGTAACCGCCAACGATAACAGTC	GTCACCTGCTTCCAAATGGT	DQ483258	60.00-59.97	218
153A	TGTAAAACGACGGCCAGTCACTGCTGTGATGTGGTCCT	GCAGAGCTCTCCAAGTAAGCA	DQ483261	59.74-59.91	181
154A	TGTAAAACGACGGCCAGTTGGTATGGTCCAGCAGACAG	CCTCCATGCATGTGTGAGTG	DQ483262	59.70-61.19	207
155A	TGTAAAACGACGGCCAGTGAAGCTGGCACCTTTGTCTC	GGCGCTTAATGCACAAAACT	DQ483263	60.00-60.27	203
156A	TGTAAAACGACGGCCAGTCATTTCGTGGAAGCCAAAAC	TCCTTTCCCTACAGCCCTTT	DQ483264	60.48-60.07	213
157A	TGTAAAACGACGGCCAGTAAAACAGGGGAAGGCTCATT	CAAATGTGGCATGCTTTTGA	DQ483265	59.94-60.64	237
165A	TGTAAAACGACGGCCAGTCATCCACAGGTCAAGGGTTT	TCCTGCCAAGAGGTCTCCTA	DQ483273	59.82-59.94	168
167A	TGTAAAACGACGGCCAGTGAGCGATAAGCGGCTTGG	CACAGTGTCAGTGCCACACA	DQ483275	61.96-60.43	288
172A	TGTAAAACGACGGCCAGTGACGTACTCCCACCAGGAGA	GCACAAGATGTGCAACAAAA	DQ483280	60.11-58.32	176
174A	TGTAAAACGACGGCCAGTCTCCCACATCCATCCAAGTC	TACCCTTGAGCTCCAGCACT	DQ483282	60.33-60.01	244
175Aa	TGTAAAACGACGGCCAGTCCTCAATTGCTGTTGCAGAA	CCTGACGTGATCTCCCTTTC	DQ483283	59.99-59.65	229
175Ab	TGTAAAACGACGGCCAGTAGGGGATATGGCTGTCTGTG	GGTTCAACCTGTAGCGAAGC	DQ483283	59.95-59.88	187
176A	TGTAAAACGACGGCCAGTTTTTTGGGGTCATTTTGGTC	AACATCCTCCTGGTGGAAAA	DQ483284	59.64-59.38	220
186A	TGTAAAACGACGGCCAGTGCAGACCTGCTCTCATCACA	TCCCCAAAGAGCACAAACTC	DQ483294	60.15-60.23	235
4D	TGTAAAACGACGGCCAGTCCTGGGTTGAAGCCATACTG	GAGGAGAGGATAGGAAGAGATCG	DQ483445	60.51-59.83	289
10Da	TGTAAAACGACGGCCAGTTCACATCGATCCGATCACAC	AATGGCATGAACTGGAAAGG	DQ483451	60.51-59.93	325
10Db	TGTAAAACGACGGCCAGTCCTTTCCAGTTCATGCCATT	TTGATCTGGAACGTGACTGC	DQ483451	59.93-59.84	237
14D	TGTAAAACGACGGCCAGTTGGCAGTCTTTCCTCTTGTTG	TGGCGTCCAAAAGCTAAACT	DQ483455	60.42-59.88	157
20D	TGTAAAACGACGGCCAGTATGAGGCAGGAGTCTTGTGG	AAATGCCCCCTTCTGTCTCT	DQ483461	60.26-60.07	169
21D	TGTAAAACGACGGCCAGTAAGCCCGGCAATGTTTACTA	CTGCCCCTCCAGGAAAAA	DQ483462	59.61-61.11	245
30Da	TGTAAAACGACGGCCAGTTGCAGGCATCAAGCTTATCA	CCAACTCGCTAACCCTGAAA	DQ483471	60.51-60.24	394
30Db	TGTAAAACGACGGCCAGTTTTCAGGGTTAGCGAGTTGG	GGCTTTCCTGAAGTCTGTGC	DQ483471	60.24-60.00	171
35D	TGTAAAACGACGGCCAGTATCCCCATGGCTGTAAATCA	TGCAATATGAAGCCATCAGTG	DQ483476	60.16-59.70	226
36D	TGTAAAACGACGGCCAGTATGCAGCCCATCCTTTGATA	AGCACCAATTTTCTGCAACC	DQ483477	60.44-60.12	245
39D	TGTAAAACGACGGCCAGTCTGCGTGGTGCTTAGTTGC	CACCAGCTTTACAAAACCAGAA	DQ483480	60.61-59.31	164
40D	TGTAAAACGACGGCCAGTGACGCGCTTTAAAAAGGAAA	CGCTCATCCTCTCACTCCTC	DQ483481	59.49-60.10	226
42Da	TGTAAAACGACGGCCAGTTTGCCAAAAATCCCTCAGTC	ATGGGATGGGATCACAGAAT	DQ483483	60.05-59.02	164
42Db	TGTAAAACGACGGCCAGTTCCCATCCCATGATACACCT	GTGGTGGCAGAAGACAGGAC	DQ483483	60.01-60.72	156
43D	TGTAAAACGACGGCCAGTTGTGACGGATCTCAAAGCAG	TTTCTGCCAAGGAAATGGAG	DQ483484	59.98-60.18	219
46D	TGTAAAACGACGGCCAGTCCCACCTGTTTCATCCAACT	TCTCTTGGCTTTTGCTGTGA	DQ483487	59.82-59.72	155
49D	TGTAAAACGACGGCCAGTACAGCAGCCACAGCATTAAG	CTTCTCGGCGTGGTTTTC	DQ483490	59.10-59.37	220
50D	TGTAAAACGACGGCCAGTTGAGCTGTCCCTGTGTTCAG	GCCACAGCATAAGAGCAACA	DQ483491	60.02-60.02	198
53D	TGTAAAACGACGGCCAGTAGGAGGTATGTAGGAAGCAGGT	AACCTCATCCACCTCATGGT	DQ483494	58.31-59.23	219
55D	TGTAAAACGACGGCCAGTTGGAGCTCTGTCCTGGAAAT	GCATGAAATGAAGGTGCAGA	DQ483496	59.80-59.81	152
56D	TGTAAAACGACGGCCAGTAGAGCAGTGAAGGAGCAAGC	CCTTTTCTCTCCTTTGTTCACC	DQ483497	59.90-59.26	243
57D	TGTAAAACGACGGCCAGTAAAGCTGCACTTTCCTTTGG	TTCAGAAAAGTGGCACAGGT	DQ483498	59.49-58.34	168
58D	TGTAAAACGACGGCCAGTCCTCCCCCTCCTTTTTGTTA	CAGGAATAGGAGGCTGTGAAA	DQ483499	60.28-59.32	272
61D	TGTAAAACGACGGCCAGTGATGAAGAGGCTAGAGGCTAGAGA	TATCCAGCTTCGCTCACTCA	DQ483502	59.80-59.70	206
82D	TGTAAAACGACGGCCAGTGGCATGCAAGCTTACAAGATA	CCTCCTCGTTGTCCTCTTCA	DQ483523	58.08-60.38	365
84Da	TGTAAAACGACGGCCAGTTGAGCATCACACATCTCTTGG	TGAGCTACCGTGATTCATGC	DQ483525	59.85-59.83	201
84Db	TGTAAAACGACGGCCAGTGCATGAATCACGGTAGCTCA	TCGTATAGCAGCTTCACAGTGTT	DQ483525	59.83-59.12	231
92D	TGTAAAACGACGGCCAGTCCGGAAACAGAAGAACTGGA	CCTTACAAGGCTGGCACAAT	DQ483533	60.22-60.13	166
102D	TGTAAAACGACGGCCAGTTTATGTTTCTGGGGGTCTGC	GGCGGGGAAATGTAGGTATT	DQ483543	59.93-60.04	107
103D	TGTAAAACGACGGCCAGTCCCATGGAATGGGAAAATAA	CATTTGCATCATGCTCAGGT	DQ483544	59.46-59.68	242
104D	TGTAAAACGACGGCCAGTTGCTCCCTACTTGGCTTGTT	GTGCAGCAGCAGGAAAATCT	DQ483545	59.88-60.55	153
106D	TGTAAAACGACGGCCAGTGGCGTAAGAGGCAATGAGAA	ACCTGCTTTGAGCTGCTGAT	DQ483547	60.35-60.16	241
109D	TGTAAAACGACGGCCAGTCGTGTCCTGCTGCATCTAAC	GAGGGAGAAAACAGGCAGTG	DQ483550	59.47-59.84	223
116D	TGTAAAACGACGGCCAGTGGAGAAGAAACCAGGAAGCA	ATGCTGAGGCAAGGCTATGT	DQ483557	59.41-59.87	194
118D	TGTAAAACGACGGCCAGTGGACACGGGGAAATTACTTG	CACGGAGCAGCAGAGAAAAT	DQ483559	59.29-60.54	211
120D	TGTAAAACGACGGCCAGTTGGGCACAATTCACCAAGTA	GCTGAGATTTCCTGGACCAA	DQ483561	59.96-60.20	176
124D	TGTAAAACGACGGCCAGTTGCAACCAACTGAAAATGGA	GCAATGGGAATGGCATAGAC	DQ483565	60.09-60.30	197
125D	TGTAAAACGACGGCCAGTCTTTCAACCAGCCAAGCATT	CTGAACCTGGGCTTGACCTA	DQ483566	60.25-60.25	190
133D	TGTAAAACGACGGCCAGTTTTCAGAATGTCCCAGAATGG	ATGGAGGGAATTCAGCACAG	DQ483574	59.92-60.07	156
9Fa	TGTAAAACGACGGCCAGTGGGAACAAAGGAGTGAGACG	AGCAGGAGACAACAGCAGGT	DQ483586	59.70-60.06	184
9Fb	TGTAAAACGACGGCCAGTTCGCCTTTTACTGCTGACTTC	AAGAGGAGGAGAGGCTACACG	DQ483586	59.65-60.02	179
20F	TGTAAAACGACGGCCAGTGGGGAGCCAGTTTTGTATTG	TCTGAAAAGGATTAGCTGCACA	DQ483597	59.43-60.02	225
21F	TGTAAAACGACGGCCAGTGGCTGAACCCTACTCTGTGTG	TTCAATTAGCCCTGACAGCA	DQ483598	59.78-59.42	152
23Fa	TGTAAAACGACGGCCAGTCCCAGCCAGGAGACTGTAAA	TTCTTTGTCTTCTTTGCCTTCA	DQ483600	60.25-59.13	175
23Fb	TGTAAAACGACGGCCAGTTGAAGGCAAAGAAGACAAAGAA	CCAGAAAATGGCTTTGCCTA	DQ483600	59.13-60.20	236
32F	TGTAAAACGACGGCCAGTGCATGCTTTCTTCCCAGAAC	GTTGCTGCAAATTCTGTCCA	DQ483609	59.82-59.85	181
35F	TGTAAAACGACGGCCAGTACCTCCCACCTACCCAAAAG	CATAGAGGCAGGGAAACCAA	DQ483612	60.22-60.07	220
36F	TGTAAAACGACGGCCAGTTCTGCTAACTTGTGACTTCCTCA	AGCTGACACAATGGATGCAC	DQ483613	59.18-59.71	245
38F	TGTAAAACGACGGCCAGTCACCGGACAACAGCATGA	CTTTTCGCTTTCCTCCTCCT	DQ483615	60.25-59.96	108
39F	TGTAAAACGACGGCCAGTGAAGGAGCCACTGGAGTGAT	TACCAAAGGGCTTTTGTGCT	DQ483616	59.26-59.75	249
42F	TGTAAAACGACGGCCAGTCTTTCCTCCCTCCAGCAG	CCGTAAATTCACTGGGAGGA	DQ483619	58.45-59.93	400
46F	TGTAAAACGACGGCCAGTTCCTCCCTTTTTAGCCTTCTG	AACGTATACGCAGCTTCAGGA	DQ483623	59.84-59.92	391
53F	TGTAAAACGACGGCCAGTCAATTGCATTGGGCATCC	TCTTCCTATCTTTTCTTCTTCCTCTC	DQ483630	60.85-59.16	395
57F	TGTAAAACGACGGCCAGTGATGAAGAGGCTAGAGGCTAGAGA	AGCAGCTTCTGCTCACTCAC	DQ483634	59.80-58.49	205
58F	TGTAAAACGACGGCCAGTTGCAGGGAGGCATTAGAAGT	ACGTGTGGCAAAATTCCTTC	DQ483635	59.84-59.98	173
63F/CH262-21P20_1	TGTAAAACGACGGCCAGTGCAGAGAGTTTCTCCTTTTGC	TGGAACAAAACAAACACCACA	DQ483640, AC171743	58.33-59.89	695
65F	TGTAAAACGACGGCCAGTGCCTCAGGGAGAGAGGAAAG	AAGAAGGCAGCTCCACAGAG	DQ483642	60.47-59.75	192
68F	TGTAAAACGACGGCCAGTTCTGGCAGAACTAATGTTCTTGA	CCCCCTTTTGGTTATATTCCTT	DQ483645	59.03-59.48	246
73F	TGTAAAACGACGGCCAGTGTGCTGGCTCCAGATTATCC	TTGCCGATTCATTTTTGTCA	DQ483650	59.66-60.05	248
74F	TGTAAAACGACGGCCAGTCCTAAAACAATGGCAGGGACT	GGGCCTGGATGGTTAAAGTT	DQ483651	60.36-60.19	152
76F	TGTAAAACGACGGCCAGTATCTTACTGCCGGGACTCCT	CAGCTCAGCACGGCTCTG	DQ483653	60.10-62.13	627
82F	TGTAAAACGACGGCCAGTTCCCCCATGTTCTCTCTGAC	ACTCACCGCTTCCATAGGTG	DQ483659	60.05-60.13	226
84F	TGTAAAACGACGGCCAGTTCAGGAAAAGCAGCATGAATC	TTTAGCTGAACTGGCGGTTT	DQ483661	60.35-59.88	239
85F	TGTAAAACGACGGCCAGTCTGACGGGAGGTTTGAAAAG	GCCTTACCCCATGAACAAGA	DQ483662	59.71-59.93	215
86F	TGTAAAACGACGGCCAGTCCCTTGTAATCAGAGGGGAAA	ACGAGATTCGGTGACAGTGA	DQ483663	60.30-59.26	211
95F	TGTAAAACGACGGCCAGTACCTGGAGGACATTGCTGAT	AAACTAAGCCCTCCCCAACT	DQ483672	59.54-59.10	177
96F	TGTAAAACGACGGCCAGTGCTTGAGAGTCTATTGAATGAGGTC	TGACCGTTCGATTCCTGAG	DQ483673	59.82-59.77	250
100F	TGTAAAACGACGGCCAGTAGGGACTGTGCTGGAATCAT	GACCAAGGGATGCACATTTC	DQ483677	59.54-60.33	199
104F	TGTAAAACGACGGCCAGTAGGTAGGGGGAAGAACAAGG	CTACCCACTCCAGTGCCATT	DQ483681	59.43-59.99	228
115F	TGTAAAACGACGGCCAGTTGCTCTGGTCAGATCTGTTGTT	ATAAACGAGGGGGAAAGCTG	DQ483692	59.91-60.44	354
116F	TGTAAAACGACGGCCAGTCAGCCTCCTCCTGAAAGAAA	TTTTCTTGGGTTTATTTCTCTTTTT	DQ483693	59.54-58.06	290
117F	TGTAAAACGACGGCCAGTCCAGGATGCTTGGTTTTCAG	GAGGAGTTGTCTGGGAGGAA	DQ483694	60.63-59.23	350
142F	TGTAAAACGACGGCCAGTGGAATCTCTCCAGTCGATGC	GTCCCTCTCTTTTCCCCAAG	DQ483719	59.77-60.04	535
151F	TGTAAAACGACGGCCAGTGCTTCTCCAGAGAGCTCCAA	GCTCTTCAGCAGCTTTTGCT	DQ483728	59.83-60.04	159
153F	TGTAAAACGACGGCCAGTGGACAGAGGGATAAAGGCAGA	GCATCCCTCATTGTCTCTCC	DQ483730	60.58-59.62	488
157F	TGTAAAACGACGGCCAGTTGTCCATAACCTCAGGCAGA	AAGTGTTCCCAGTTGCCAAG	DQ483734	59.24-60.15	205
158F	TGTAAAACGACGGCCAGTACATAAAAGCTGCCCTGTCC	GAGGGTGGATCGCTGCTC	DQ483735	59.20-61.96	381
163Fa	TGTAAAACGACGGCCAGTCCTCCCCCTCCTTTTTGTTA	AAGATCATTTTCTCAGGTCTCTGG	DQ483740	60.28-60.13	268
163Fb	TGTAAAACGACGGCCAGTTCTGCTACTGATGGCACGTC	AGCAGGTTTTCAGCCAGCTA	DQ483740	60.02-60.15	242
165F	TGTAAAACGACGGCCAGTGGTGTATCTATTCACGTAATCTTGTG	ATGAGGGTCTGATGGCAAAC	DQ483742	58.19-59.93	150
166F	TGTAAAACGACGGCCAGTCTGCAACCAAGATGCAAAAA	GGTTTGGTTGAATAAAGGTCCA	DQ483743	59.85-60.09	225
172F	TGTAAAACGACGGCCAGTAGTCAGGTGTTGGGGAAGG	TAGCAGTTCAGGAGGGGTTG	DQ483749	59.95-60.25	392
180F	TGTAAAACGACGGCCAGTGGGCTGCTTATGTGTTTTAGG	TGAACGTATAGCAGCTTCAGGA	DQ483757	58.78-60.04	345
181F	TGTAAAACGACGGCCAGTCAAATGGCCTTCTCCTGATT	GGGACATCACTTCAGCCTGT	DQ483758	59.13-60.12	164
184F	TGTAAAACGACGGCCAGTGCATGCAGCTTCCAGGAG	GATGGTGCCCATGTAGCTCT	DQ483761	60.68-60.10	366
185F	TGTAAAACGACGGCCAGTTGAGAGGTTCAGAGGTCTTGC	CTAGGCATTTCCTCCACAGG	DQ483762	59.59-59.69	235
188F	TGTAAAACGACGGCCAGTACCGTGAAGTCTCCATCTGC	CACACCCATACCCCAAAAAC	DQ483765	60.27-59.95	241
190F	TGTAAAACGACGGCCAGTCGGACCGGGATCTCTACAGT	ACTTGGGTTGGCTTGGTATG	DQ483767	61.44-59.85	158
192F	TGTAAAACGACGGCCAGTATGGGGTCAATTTTGATTTTT	TTCCTTTTGTTGTTGTTTGTTTG	DQ483769	57.34-59.10	296
195F	TGTAAAACGACGGCCAGTAACCTGGGTTTGAGTCATCG	ATGGTGCTGTGAAACTGTGC	DQ483772	59.97-59.76	218
201F	TGTAAAACGACGGCCAGTTTCTACGGAGGGAACAAGGA	AAAGGCAGCACCGGACAG	DQ483778	59.66-62.40	165
205F	TGTAAAACGACGGCCAGTAGAGGATGCAGTTGTGTGAGAA	CACAGAAATGCACGGTGTTT	DQ483782	59.91-59.62	371
207F	TGTAAAACGACGGCCAGTGATGTGATCTGGCTGCAGAA	CGACGGCATTGTGAATCTTA	DQ483784	59.95-59.69	352
216F	TGTAAAACGACGGCCAGTACGTACCAGCTCTGGGGTA	GCAGCAGAGTTAGGCACAAA	DQ483793	58.17-59.22	493
220F	TGTAAAACGACGGCCAGTGACCCCAAGCTCACTGAAAC	CACCTGCCTCCCAAGAGTTA	DQ483797	59.70-60.25	220
233F	TGTAAAACGACGGCCAGTTTGGAACATGCACAACAGGT	TGGCTGGAGCTCTCTTCACT	DQ483810	60.01-60.28	232
234F	TGTAAAACGACGGCCAGTTCTACATCGCTGCTTTTGTGA	CGTATCAGCAGCTTCAAAGG	DQ483811	59.62-58.68	397
236F	TGTAAAACGACGGCCAGTGAAACTGTTGGAGGCGTCAG	GCTCCCTGCCCATATTCTTA	DQ483813	60.83-59.14	596
237F	TGTAAAACGACGGCCAGTTTTTGTCCTGCTGACTCCTC	ACAGCATAAGGAGGGGGAAT	DQ483814	58.00-59.79	157
241F	TGTAAAACGACGGCCAGTACCTTGGGATGCAGAATGAC	ACAGTCCATCCCTTCACCAC	DQ483818	59.93-59.82	383
244F	TGTAAAACGACGGCCAGTGATTAGCATTACTATCAGAACGTAGC	AAGACTCAGGTAATTTTACAGTCAAGC	DQ483821	57.10-59.72	379
252F	TGTAAAACGACGGCCAGTGGCATAGTCAGAGGCAGCTC	TGGTTCCCTGATTGATGTGA	DQ483829	60.13-59.89	209
253Fa	TGTAAAACGACGGCCAGTTGTACCAATTTATTGGAAGAAACAA	CAACCTTCTCAAACATCATAAACTG	DQ483830	58.93-59.15	499
253Fb	TGTAAAACGACGGCCAGTTGTGCTGAACACTCAACAGAGA	TGGCTTCGAGGAGTCTATCAA	DQ483830	59.67-59.96	250
257Fa	TGTAAAACGACGGCCAGTATGGGTGTTTTGGAGCTTTG	AGGAGAAAGAGGAGCCAAGG	DQ483834	59.97-59.95	216
257Fb	TGTAAAACGACGGCCAGTCCTTGGCTCCTCTTTCTCCT	CGTGGTTTTGGGCAATATCT	DQ483834	59.95-59.82	438
13G	TGTAAAACGACGGCCAGTAGAACTTTGTCAGTGTTGTGCAG	CCTGACCAAACTTTTAGGCATT	DQ483847	59.50-59.54	297
17G	TGTAAAACGACGGCCAGTGCTGTCACAGGCTCCAGAC	GGAAACCCCCTGCATCTG	DQ483851	59.55-61.44	244
18Ga	TGTAAAACGACGGCCAGTTGCTGACCAAGTTTTTGTTGTT	GCTTGTGCTGTGCTGTTTTC	DQ483852	59.69-59.65	249
18Gb	TGTAAAACGACGGCCAGTAACGCAAAGGCATAAAGCAA	TCACTCTGTTTCGGTCGTTG	DQ483852	60.75-59.87	154
18Gc	TGTAAAACGACGGCCAGTAGCAACGACCGAAACAGAGT	CAGCCAGCCTTCTGTTGTCT	DQ483852	59.91-60.59	250
25Ga	TGTAAAACGACGGCCAGTTCTGAAGTGGCAGTGGAGTG	CAAGACTGGAAGGCCAATGT	DQ483859	60.02-60.11	156
25Gb	TGTAAAACGACGGCCAGTCAGTGTGCCAAGCCAAAGTA	GAGGCAGAGTGGAAGACGAC	DQ483859	59.90-59.99	245
33G	TGTAAAACGACGGCCAGTAGGGCATGTGCATTAAAAGG	TTCAAAGGCTTGTCCATGTG	DQ483867	59.96-59.69	220
37G	TGTAAAACGACGGCCAGTTTGAAATGGGTACAGGCACA	TGCATGCCTATTTCAAAAGAGTT	DQ483871	59.96-60.14	193
47G	TGTAAAACGACGGCCAGTGAACCAGAAAAATGCCAGGA	GCACAGGAACAAAAACCACA	DQ483881	60.05-59.59	186
48G	TGTAAAACGACGGCCAGTTCGTATGCTTACCCCAAAGC	GACACACAGCCTGGACTTCA	DQ483882	60.10-59.87	152
51G	TGTAAAACGACGGCCAGTCAGCATATAAAAGCCCTTCCA	GTTGGAGAATGGGATCATGG	DQ483885	59.22-60.13	206
54G	TGTAAAACGACGGCCAGTTTCAAAACTGCAAAGGGTTG	TCAATTGTGCCAGAACAGGA	DQ483888	58.79-60.24	194
63G	TGTAAAACGACGGCCAGTCCTGGAAAAAGTGTGCTTCTG	GGCAGGAGGGAGGAAAATAG	DQ483897	59.90-60.03	243
64G	TGTAAAACGACGGCCAGTGCCTAAGCATCCAAACCAAC	ACCTGGAGAGGAGCTGTGAA	DQ483898	59.57-59.99	250
81G	TGTAAAACGACGGCCAGTGCATCATGAGGACAGCAAAG	AAGGAAAGTTGCCAAAGCAG	DQ483915	59.40-59.49	175
82G	TGTAAAACGACGGCCAGTTTGCATTTGACAGCTTGCTT	TAGACCTGCCAGCATGAAAA	DQ483916	59.61-59.42	228
93G	TGTAAAACGACGGCCAGTTCGCACAAGATCACACTTGC	TGTGAGGTGAGAGTGAGAGCA	DQ483927	61.04-59.75	577
94G	TGTAAAACGACGGCCAGTGGGGAAGAAAGAGTCCTGAGA	TCCTCATCTTCTGCCACCTT	DQ483928	59.80-59.80	217
97G	TGTAAAACGACGGCCAGTGGTAACCCTGGAAGCACAAG	TGACTAAACTGTTGGGGGAAT	DQ483931	59.59-58.42	224
109G	TGTAAAACGACGGCCAGTCTTCAATGCCCCAGTTGTTT	AAATGCAAGCATGGGTTTTT	DQ483943	59.97-59.46	155
111G	TGTAAAACGACGGCCAGTCCTGCTGGTTAAAGCTACCC	GTAGCGCAAGTCCATGACAA	DQ483945	58.86-59.87	201
112G	TGTAAAACGACGGCCAGTAAAGACTCAAATCCCCCACA	AGCCCCTTTTGGTGCTAGAT	DQ483946	59.38-60.10	224
114Ga	TGTAAAACGACGGCCAGTCCGAAAACGATGACAATCCT	AACGAGACTAGTGAGCGTAGGT	DQ483948	59.93-57.34	390
114Gb	TGTAAAACGACGGCCAGTTATATTGCCGTCCGTCACTG	TGAATGTTGGTAATGATTGTTGTG	DQ483948	59.57-59.67	228
125G	TGTAAAACGACGGCCAGTGCCTATCATTTAGGCACAGAGA	GCCTGGGTATTCAGATGGAA	DQ483959	58.49-59.89	179
130G	TGTAAAACGACGGCCAGTAGCTTCCTCGGTAGGGAAAA	CACCGGACAACAGCATGA	DQ483964	60.20-60.25	160
144G	TGTAAAACGACGGCCAGTCAAGCGTGACAGCACATTCT	TGAAATGTCAAATTTATGATACAACA	DQ483978	60.06-57.67	569
147G	TGTAAAACGACGGCCAGTCGGACAACGGCATGTTGAT	CAGCTTCTCAGTAGGAACAAAGG	DQ483981	62.92-59.59	153
148G	TGTAAAACGACGGCCAGTTCTCCAGTTTGCACTGGTTG	TCTGCGCTGGTGTAAATCAC	DQ483982	59.87-59.87	240
151Ga	TGTAAAACGACGGCCAGTTGGACGAGACACGACGATTA	TCGAGTGTCACGTCTACTAGGG	DQ483985	60.26-59.42	248
151Gb	TGTAAAACGACGGCCAGTAGACGTGACACTCGACGAAC	AGCGAGTTAGTGTCCGTGGT	DQ483985	58.89-59.79	489
157G	TGTAAAACGACGGCCAGTTCAATAATAACAGGAAGCAAGTGG	TGCCTTCATTCCTGGAAGTC	DQ483991	59.58-60.20	166
160Ga	TGTAAAACGACGGCCAGTAACCTCAGCATTACCAGCAA	CTGTGCACTGCAAATGTGTG	DQ483994	58.38-59.94	225
160Gb	TGTAAAACGACGGCCAGTGCAGCCAGTGCACACATTT	ACTGTGCTGCTGTGCTGTG	DQ483994	60.90-59.81	477
160Gc	TGTAAAACGACGGCCAGTACAGCACAGCAGCACAGTTC	AAGCTTTCCCTGCCTTTCTC	DQ483994	60.26-59.96	202
165G	TGTAAAACGACGGCCAGTATCATCCCTCCCCAGAAAAG	GTGCAGTTCCCTGTCCTGTC	DQ483999	60.26-60.72	164
168G	TGTAAAACGACGGCCAGTCTGCACATGGGCCTAAAAGT	TCATCCGCTGTGTAGAGCAC	DQ484002	60.13-60.02	208
173G	TGTAAAACGACGGCCAGTCTGCTCCTGTTTCTGCCTTT	GTGGGGACACGCCATACT	DQ484007	59.62-59.35	397
179G	TGTAAAACGACGGCCAGTAGCAGCTTCCCCTCTCTTTC	GTGACAGCGAGCAAGACAAA	DQ484013	60.10-60.18	274
180G	TGTAAAACGACGGCCAGTTGACACAATACATTCCAAGCAA	TTGGTACGTGCTGCAGTTTT	DQ484014	59.09-59.39	238
182G	TGTAAAACGACGGCCAGTAGAGCAGTGAAGGAGCAAGC	CCTTTTCTCTCCTTTGTTCACC	DQ484016	59.90-59.26	243
195G	TGTAAAACGACGGCCAGTCCTGGCTGCTGCAGATTACT	AGGGACACGTGAACAGAACA	DQ484029	60.56-59.15	159
198G	TGTAAAACGACGGCCAGTACTGGCTGCAGGTAAAACCA	AGTAGCCCTGAAGCCAACCT	DQ484032	60.69-60.27	168
199G	TGTAAAACGACGGCCAGTTTCAACAGGAGGAAACAGGAG	TCCTCCTCTTCTTCACATTATTCC	DQ484033	59.31-59.97	591
200G	TGTAAAACGACGGCCAGTAGCTCAAGCATGCTGACAAA	TTGCAGGCAAGAATTGACAC	DQ484034	59.75-59.85	178
201G	TGTAAAACGACGGCCAGTCCACCTCATGCTGAAGTCTC	CTCTGATCAGGGGAGGGATA	DQ484035	58.38-59.04	245
7H	TGTAAAACGACGGCCAGTGTGACAGCGAGCAAGACAAA	TTCCCCACCAATTTCTTCTG	DQ483304	60.18-59.90	150
13Ha	TGTAAAACGACGGCCAGTTCATGGGCAATGAGAACATC	CTATCCATCCGATCCTCTGC	DQ483310	59.46-59.61	207
13Hb	TGTAAAACGACGGCCAGTCGAATATATGACTGGGGCAAG	TTTTTCTATACAACCTACGCTCAG	DQ483310	59.44-57.02	229
13Hc	TGTAAAACGACGGCCAGTCTGAGCGTAGGTTGTATAGAAAAA	TGACATGAGGGTCTGTGAGC	DQ483310	57.02-59.83	156
17H	TGTAAAACGACGGCCAGTTTTCCGGAGGAGTACAATCG	CCAGAACCACATTTGGATGG	DQ483314	60.07-61.16	182
18H	TGTAAAACGACGGCCAGTGCAAAATGGTCCAGAAGACC	CAAGCTGCTGATGGAAACAA	DQ483315	59.53-59.99	207
25Ha	TGTAAAACGACGGCCAGTCTGCTAGGGCCTTCCTTTCT	GTTTGTCAGTGGATGCATGG	DQ483322	59.98-59.97	180
25Hb	TGTAAAACGACGGCCAGTCCATGCATCCACTGACAAAC	CACACACCGTACCCCTGAG	DQ483322	59.97-60.01	191
27H	TGTAAAACGACGGCCAGTTCAGTGGAGAGCGATGTGAC	CAAGGCACCATCCTCCAATA	DQ483324	59.99-60.85	178
29H	TGTAAAACGACGGCCAGTGATGCCATTTGGCAGATAAGA	GCTCTCCCCAGTTCAATCAG	DQ483326	60.05-59.80	250
30H	TGTAAAACGACGGCCAGTGGAGCAATGGATGTTTCGAT	ATTGCAGACCACCAGAAAGG	DQ483327	59.90-60.11	197
37H	TGTAAAACGACGGCCAGTTCAAAGGAAGCGACCTGTCT	TGTGAGGTTAGCTGCAGATTG	DQ483334	59.99-59.09	157
38H	TGTAAAACGACGGCCAGTTTGTCCTGATGGCTCCAAGT	GGTACAGATGCACCCCTTGA	DQ483335	60.66-60.92	182
51H	TGTAAAACGACGGCCAGTCCATCATTTAAAAGACAGCCAAT	CCGTACGAATGCAGATTTGA	DQ483348	59.41-59.69	169
52H	TGTAAAACGACGGCCAGTGATTCCTCATTTGGGCTGAA	AGGAGGTCTGGCTGGAGAAT	DQ483349	60.01-60.22	236
57H	TGTAAAACGACGGCCAGTTGAAGGAGGAGGCTGTGTTT	GGCTTGCCCTTTTGAACATA	DQ483354	59.84-60.07	226
60Ha	TGTAAAACGACGGCCAGTTCCATCATCCGTGGTAACAA	TTGAGTGGAGTGATTTGAATGG	DQ483357	59.77-59.97	151
60Hb	TGTAAAACGACGGCCAGTCCATTCAAATCACTCCACTCAA	CCTGATTGCACCTGTCACTG	DQ483357	59.97-60.31	386
61H	TGTAAAACGACGGCCAGTCACCACCCCAGACATGTTAAG	AGGAACGGAAATACAGAAGGA	DQ483358	60.28-57.80	237
63H	TGTAAAACGACGGCCAGTCAGACCGAGCTGGTGATTCT	CTGCAGTCTGGCGTCATAAG	DQ483360	60.41-59.62	235
71Ha	TGTAAAACGACGGCCAGTTCTCCTGCAGCTGACTATGC	CACTGCGCTGCAATGTGT	DQ483368	59.30-60.66	239
71Hb	TGTAAAACGACGGCCAGTACAACACCAGCGCAGTGA	GGCTTGTCCTCGTGTCTGAT	DQ483368	60.03-60.27	235
74H	TGTAAAACGACGGCCAGTTCCCTTTAGACAGGCAGCAC	AGTACCCTGCCCTTTGTCCT	DQ483371	60.40-59.99	188
75H	TGTAAAACGACGGCCAGTCCCCTGGACAGTGGAATTTA	GGCTTCTGCTGATGAAGGAC	DQ483372	59.78-59.96	249
79H	TGTAAAACGACGGCCAGTAAACGGGAAATGGATGGAAG	AGGACATTTTGCGGACAGAC	DQ483376	61.04-60.12	152
81H	TGTAAAACGACGGCCAGTACGGAAGAAGTGCTGAAGGA	TTGGCACCTTGAGTGTGAAG	DQ483378	59.99-59.87	244
86H	TGTAAAACGACGGCCAGTGACGCGCTTTAAAAAGGAAA	CTCCTCTTCTCGTCTGTGCTC	DQ483383	59.49-59.34	248
89H	TGTAAAACGACGGCCAGTCACCTCTCTGTCCTGCTCTG	CAGGACACGTGGTATGGAGA	DQ483386	58.70-59.55	386
92H	TGTAAAACGACGGCCAGTTTTTCACTTCTACCCTTGTCCA	GAGCACAAAATGCCAGTGAA	DQ483389	58.74-59.85	220
101H	TGTAAAACGACGGCCAGTCGTGTACACCTGCCTTTCCT	ATGGAGAGATGGGATGCAAG	DQ483398	60.17-60.03	208
110Ha	TGTAAAACGACGGCCAGTCGTGAGAGTACGATGACAAGGA	GCCTTTTACTGCTGCCTTCA	DQ483407	60.31-60.52	157
110Hb	TGTAAAACGACGGCCAGTGGAGACAACAGCAGGTGGAT	GCAGCTTCTAGGGAGGGAAC	DQ483407	60.12-60.35	191
111H	TGTAAAACGACGGCCAGTCAAAGCTCAGGGGATCATGT	TGGGAGCTATCTTGCTGGAC	DQ483408	60.07-60.36	246
113H	TGTAAAACGACGGCCAGTCCCCAGTTGCCAAACATATC	TCTGAAAAAGAGGCAAAGACAA	DQ483410	60.19-59.13	248
114Ha	TGTAAAACGACGGCCAGTGCCTGACACCTGAAGGTACTG	TGGGGAAAGCTTAACTTGGA	DQ483411	59.78-59.68	188
114Hb	TGTAAAACGACGGCCAGTTGCCAGAAAGCTCATAAGGAA	GAGGGATGCAAGGATAACGA	DQ483411	59.97-60.04	195
119H	TGTAAAACGACGGCCAGTCAGCACCTAGCTGCAGTGAC	ATGTGCTTTCCTGCTCCACT	DQ483416	59.80-59.87	288
120H	TGTAAAACGACGGCCAGTTTTGAAAGTGGGTGTGAGGA	CACTCCTCTAAACCCGGAGA	DQ483417	59.11-59.28	193
121H	TGTAAAACGACGGCCAGTTGTTTTGGCTTTTCCTTTGC	CTCATTCGGCTTGGAAAGAT	DQ483418	60.22-59.27	237
123H	TGTAAAACGACGGCCAGTGCAGAGGCTGGAGGTAACAC	CCATGAGTTGTTTGGGATGG	DQ483420	59.87-61.16	218
124H	TGTAAAACGACGGCCAGTCAGCACTGGAGGGTCAAAGT	ATGAGTCAGAGCAGGGGAGA	DQ483421	60.30-59.94	242
128H	TGTAAAACGACGGCCAGTATCCTTCCCTCACTCCCTTC	TGGGAGCCTCAGGTAAAGAA	DQ483425	59.49-59.81	160
129H	TGTAAAACGACGGCCAGTTCCTTGCTGGACTGACCTCT	AACTGGTCCGTCGATAGTGG	DQ483426	59.99-59.99	239
132H	TGTAAAACGACGGCCAGTGAGCTTTCCAGACGTTGAGG	GATGCAAGAAAAGCGACACA	DQ483429	59.99-60.00	206
133H	TGTAAAACGACGGCCAGTCAGAAATGCGCTTTGTGTGT	GCCTGTTGGGATGACTCCTA	DQ483430	59.91-60.07	220
135H/CH262-154B5	TGTAAAACGACGGCCAGTAAGCAGAGTTTGCTGCGAAT	GGAGAAAGGCATTTGGAGTG	DQ483432, AC191192	60.16-59.67	238
137Ha	TGTAAAACGACGGCCAGTAGCAGTGCTGGGTTAGCTC	TGCATCAGAAATCTCTCTCTTCC	DQ483434	58.20-59.98	488
137Hb	TGTAAAACGACGGCCAGTTGACGTCCACCTTGTGATGT	CCCAAGAAGGGTGAAAAGTG	DQ483434	60.00-59.56	198
139H	TGTAAAACGACGGCCAGTCTTGCTTCCAACCGATTTGT	CTCGTTCTCAGCCTTCATCC	DQ483436	60.11-59.95	244
140H	TGTAAAACGACGGCCAGTGTCCAGGGTCTGCCCTTC	AGTGCTCTGTGGTGGCTCTT	DQ483437	60.62-60.06	234
142Ha	TGTAAAACGACGGCCAGTTTTGGCATTCAGGTGGTGTA	GAGCCTAAAAGGCATGTTGC	DQ483439	59.96-59.85	248
142Hb	TGTAAAACGACGGCCAGTATGGAGAGATGGGATGCAAG	CGTGTACACCTGCCTTTCCT	DQ483439	60.03-60.17	204
142Hc	TGTAAAACGACGGCCAGTCGTATTGCCAATCAGGTCAC	TTGCGTGTGAATACACAGAGG	DQ483439	59.00-59.77	202
143H	TGTAAAACGACGGCCAGTAAGAAAGGGGAAACAAAACAAA	TATATCATGGCAACCCAGCA	DQ483440	59.05-59.91	236
GIS8	TGTAAAACGACGGCCAGTAAGCTTCTGCAACAGGGAAG	GCGTAGGCAAGGTCAGAGAG	EF116893	59.62-60.16	364
GIS14	TGTAAAACGACGGCCAGTTTGTCCCAGTGTTAGGAAAGG	AGCCAGGTGAAGGTCTCAAA	EF116899	59.08-59.84	220
GIS17	TGTAAAACGACGGCCAGTACCAGCTTGGTGACTTTTGG	AAGCCATGTTTGGGAGAGTG	EF116902	60.15-60.11	158
GIS18a	TGTAAAACGACGGCCAGTAGGTCTCAGCCTGCAGCTTT	CTCCTTCTTTCTCGGCAGTG	EF116903	61.63-60.13	586
GIS18b	TGTAAAACGACGGCCAGTGGAAAAGGCAAAGATCACCA	ACAAGTTTGCCTTCCTGCAC	EF116903	60.05-60.30	208
CH262-13G5_1	TGTAAAACGACGGCCAGTGTTCGTCCCCCTCATTTCTT	GGCGGCTTAGATGTGCAG	AC171379	60.31-60.53	217
CH262-13G5_2	TGTAAAACGACGGCCAGTGATGAGGGCTTCACTGGGTA	CCCCCTTATATCAGCACACC	AC171379	60.07-59.27	182
CH262-21P20_2	TGTAAAACGACGGCCAGTACATCTGCAGAGCAGGGACT	GGCCTAGCAACAGCCTTTTC	AC171743	60.02-61.25	222
CH262-53D16_1	TGTAAAACGACGGCCAGTCACCAGGCAGAGAAAAACCT	GCTGCTGCTCCCTCAGATAA	AC183450	59.33-60.65	227
CH262-53D16_2	TGTAAAACGACGGCCAGTGTGCTCCTTTCCTTCAGTCG	CACCCTGCAGAGAAAATAACAA	AC183450	59.99-59.27	242
CH262-87L14_1	TGTAAAACGACGGCCAGTATGAGCCCACCTCAGTTCAG	CCCTTTTTAAGCCAGTGCAG	AC183451	60.26-59.88	243
CH262-87L14_2	TGTAAAACGACGGCCAGTTCTTCTGCATCGCTGTGTTC	TCCCTGTCAGCTTACACTGCT	AC183451	60.14-60.07	193
CH262-181F1_1	TGTAAAACGACGGCCAGTTTCACCTGCAGCAAGAAATG	ACTGCCTGGAAAGGTTAGGG	AC183845	59.99-60.49	190
CH262-181F1_2	TGTAAAACGACGGCCAGTTGGGGAACCTGCATTTTTAC	GGATTGTTATCCCCACATGC	AC183845	59.80-60.02	234
CH262-184F6_1	TGTAAAACGACGGCCAGTCAGGTGCCTTGAGCTCTCTT	ATGTTGGGCTTCTCTTTCCA	AC183846	59.75-59.67	177
CH262-184F6_2	TGTAAAACGACGGCCAGTAAGAGAGCAGGATCGCTGAG	CTGCTGCTTGGCATCTGTTA	AC183846	59.85-60.16	153
FhU2	TGTAAAACGACGGCCAGTGTGTTCTTAAAACATGCCTGGAGG	GCACAGGTAAATATTTGCTGGGCC	AF033542	54	150-200
HrU2	TGTAAAACGACGGCCAGTCATCAAGAGAGGGATGGAAAGAGG	GAAAAGATTATTTTTCTTTCTCCC	X84087	60	150-200
A8/2A/3A/128A/179A/188A	Fam-TTTGCTTTATTCCTACAGTTGC	TGGAAAATGTCTGTTGTGTTC	DQ483110, DQ483111, DQ483236, DQ483287, DQ483296	65	238 - 260	di
A20/107A	Fam-TCAGCACCATTAGTGTCAGAG	AAAGGTCCAAGTGTTTTTACG	DQ483215	58	233 - 235	di
B7/165G	Hex-AAGCCAGGATAATGTAGGAGG	AACCCCATACTGGAACCAG	DQ483999	60	177 - 189	tri
C5	Hex-GATACGGGGCACAGAGTT	CGCAAGCAGTCAAATAGATAG	EF108178	58	205 - 217	tri
D6/59D/74D/118D/123D/136D	Fam-TCACATCCAGAGCAGTCTACA	AACTTGAGGACAATTTGTGTCA	DQ483500, DQ483515, DQ483559, DQ483564, DQ483577	58	280 - 292	tetra	homologous to D10
D9	Hex-GGCAAAGTCCTTAATTTTAGC	ATCAACTGAGCAGCTCTCAT	EF108179	58	231 - 247	tetra
D10/59D/74D/118D/123D/136D	Hex-GTTGGGTCACATCCAGAGC	CGGGGAAATTACTTGCCTT	DQ483500, DQ483515, DQ483559, DQ483564, DQ483577	63	129 - 141	tetra	homologous to D6
D24/11D/133D/GIS7	Fam-CAGCCAGCTCTGAACTGA	GCAAAAGTGAGCATGAAAAC	DQ483452, DQ483574, EF116892	60	190 - 194	tetra
D126/35D/68D/132D/GIS16	Hex-GGAAGAACCTGAAAAAATGTG	GCAGAGGAAGTCCCTGTATG	DQ483476, DQ483509, DQ483573, EF116901	65	254 - 270	tetra
G8/122G/189G/200G	Fam-TCTGGAGCTGAATCTGTAGC	GACAGCCTTCACATTATTTCA	DQ483956, DQ484023, DQ484034	60	274 - 278	tetra
H3/72H/87H/134H/137H/GIS18	Fam-CCAGGTCATGTCCACTTTTT	AATCCCCAGTATCAATGCAG	DQ483369, DQ483384, DQ483431, DQ483434, EF116903	63	146 - 154	tetra
H6/69H/99H/GIS14	Hex-GGGAAAGGGTATTTAGTGGG	GGAGGGATGGTCATTATGG	DQ483366, DQ483396, EF116899	58	141 - 153	tetra
H106/29H/95H	Hex-CCATTTGGCAGATAAGAGAA	GGTATTCAGGTAGGGACAGAC	DQ483326, DQ483392	65	241 - 267	tetra
H115	Hex-GCACAGAGTGAGAGAGCATTTC	AGGAGGAGGGAGATATTCAGC	EF108180	60	224 - 236	tetra
H127/128H	Fam-AATCCCTCTCTCCTGTCCTC	CAAAAAAGAAAGTTGTGAGACG	DQ483425	63	147 - 160	tetra
H238	Hex-GGGGATATTCATCAATCTAAGC	GAACCAGACACATCATCCTTC		58	145 - 159	tetra
H269	Fam-CTCTGCTGTCCGTTTGTTC	AGGATGGCTGGATGAATG	EF108181	60	242 - 274	tetra
