# Supplementary material for: Towards a Genetic Linkage Map of the California Condor, an Endangered New World Vulture Species
Source: Animals (Basel). 2022 Nov 24;12(23):3266. doi: 10.3390/ani12233266 (PMC9739316; doi:10.3390/ani12233266)
Supplement: Supplementary file 1 [file animals-12-03266-s001.zip › Supplementary Information S4 revised.xls]

## Sheet: Sheet1
Supplementary Information S4: Genotyping data for 195 loci
No.	Marker	Sample ID	Allele 1	Allele 2
1	100A	4	243	243
1	100A	10	243	243
1	100A	11	237	237
1	100A	12	235	235
1	100A	13	243	243
1	100A	20	243	243
1	100A	21	237	243
1	100A	23	243	243
1	100A	25	237	237
1	100A	27	243	243
1	100A	30	237	237
1	100A	31	235	235
1	100A	32	243	243
1	100A	37	243	243
1	100A	39	237	237
1	100A	40	237	237
1	100A	42	243	243
1	100A	44	237	237
1	100A	45	243	243
1	100A	47	243	243
1	100A	48	235	235
1	100A	54	237	237
1	100A	55	243	243
1	100A	56	243	243
1	100A	57	243	243
1	100A	59	235	235
1	100A	64	237	237
1	100A	75	235	235
1	100A	76	235	235
1	100A	77	235	235
1	100A	78	237	237
1	100A	79	243	243
1	100A	81	235	235
1	100A	82	243	243
1	100A	83	243	243
1	100A	84	243	243
1	100A	87	243	243
1	100A	89	235	235
1	100A	92	235	235
1	100A	97	235	235
1	100A	99	235	235
1	100A	100	243	243
1	100A	101	243	243
1	100A	102	243	243
1	100A	103	243	243
1	100A	107	237	237
1	100A	108	237	237
1	100A	111	235	235
1	100A	113	237	243
1	100A	114	243	243
1	100A	122	235	235
1	100A	124	243	243
1	100A	125	243	243
1	100A	126	237	243
1	100A	127	237	243
1	100A	128	243	243
1	100A	142	243	243
1	100A	143	243	243
1	100A	146	243	243
1	100A	149	243	243
1	100A	150	237	243
1	100A	151	243	243
1	100A	152	243	243
1	100A	154	243	243
1	100A	156	237	237
1	100A	161	243	243
1	100A	162	243	243
1	100A	164	243	243
1	100A	165	243	243
1	100A	169	243	243
1	100A	170	237	243
1	100A	174	235	235
1	100A	180	235	235
1	100A	182	235	235
1	100A	183	243	243
1	100A	185	243	243
1	100A	189	243	243
1	100A	191	243	243
1	100A	192	237	237
1	100A	195	237	237
1	100A	196	237	243
1	100A	203	237	243
1	100A	210	237	243
1	100A	217	243	243
1	100A	219	237	237
1	100A	222	237	243
1	100A	231	243	243
1	100A	235	243	243
1	100A	236	243	243
1	100A	237	237	237
1	100A	238	237	243
1	100A	241	243	243
1	100A	242	237	237
1	100A	243	237	243
1	100A	250	243	243
1	100A	251	243	243
1	100A	257	237	243
1	100A	264	235	235
1	100A	265	243	243
1	100A	269	237	243
1	100A	270	235	235
1	100A	272	235	235
1	100A	280	243	243
1	100A	286	243	243
1	100A	292	237	243
1	100A	297	243	243
1	100A	309	237	243
1	100A	313	243	243
1	100A	332	237	243
1	100A	341	243	243
1	100A	1405	243	243
1	100A	2537	235	235
2	100F	4	214	214
2	100F	10	214	214
2	100F	11	214	216
2	100F	12	214	214
2	100F	13	214	214
2	100F	20	214	216
2	100F	21	214	214
2	100F	23	214	214
2	100F	25	214	214
2	100F	27	214	214
2	100F	30	214	214
2	100F	31	214	214
2	100F	32	214	214
2	100F	37	214	214
2	100F	39	214	214
2	100F	40	214	214
2	100F	42	214	214
2	100F	47	214	214
2	100F	48	214	214
2	100F	54	214	214
2	100F	55	214	214
2	100F	56	214	214
2	100F	57	214	216
2	100F	59	214	214
2	100F	64	214	214
2	100F	75	214	214
2	100F	76	214	214
2	100F	77	214	214
2	100F	78	214	214
2	100F	79	214	214
2	100F	81	214	214
2	100F	82	214	214
2	100F	83	214	214
2	100F	84	214	214
2	100F	87	214	216
2	100F	89	214	214
2	100F	92	214	214
2	100F	97	214	214
2	100F	99	214	214
2	100F	100	214	214
2	100F	101	214	214
2	100F	102	214	214
2	100F	103	214	214
2	100F	107	214	214
2	100F	108	214	214
2	100F	111	214	216
2	100F	113	214	216
2	100F	114	214	214
2	100F	124	214	214
2	100F	125	214	216
2	100F	126	214	214
2	100F	127	214	214
2	100F	128	214	214
2	100F	142	214	214
2	100F	143	214	214
2	100F	149	214	216
2	100F	150	214	214
2	100F	151	214	214
2	100F	156	214	214
2	100F	161	214	214
2	100F	162	214	214
2	100F	164	214	214
2	100F	165	214	214
2	100F	169	214	214
2	100F	170	214	214
2	100F	183	214	214
2	100F	189	214	214
2	100F	192	214	214
2	100F	195	214	216
2	100F	203	214	214
2	100F	210	214	214
2	100F	217	214	214
2	100F	219	214	214
2	100F	222	214	214
2	100F	231	214	214
2	100F	241	213	213
2	100F	242	213	213
2	100F	243	213	213
2	100F	250	213	213
2	100F	251	213	213
2	100F	257	213	213
2	100F	265	213	217
2	100F	272	213	213
2	100F	280	213	213
2	100F	286	213	217
2	100F	297	213	213
2	100F	313	213	213
2	100F	332	213	213
3	101H	4	209	217
3	101H	10	213	217
3	101H	11	213	217
3	101H	12	213	217
3	101H	13	213	217
3	101H	20	213	217
3	101H	21	213	217
3	101H	23	209	217
3	101H	30	213	217
3	101H	31	213	217
3	101H	32	213	213
3	101H	37	213	217
3	101H	39	213	217
3	101H	40	213	217
3	101H	42	217	217
3	101H	44	217	217
3	101H	45	213	217
3	101H	47	213	217
3	101H	48	213	213
3	101H	54	213	217
3	101H	55	213	217
3	101H	56	213	217
3	101H	57	221	221
3	101H	59	213	217
3	101H	64	213	217
3	101H	75	213	217
3	101H	76	213	217
3	101H	77	213	217
3	101H	78	213	217
3	101H	79	213	217
3	101H	81	209	217
3	101H	82	213	217
3	101H	83	221	221
3	101H	84	213	217
3	101H	87	213	217
3	101H	89	213	217
3	101H	92	209	217
3	101H	97	213	217
3	101H	99	213	217
3	101H	100	213	217
3	101H	101	213	217
3	101H	102	213	217
3	101H	103	213	217
3	101H	107	213	217
3	101H	108	209	217
3	101H	111	213	217
3	101H	113	213	217
3	101H	114	209	217
3	101H	122	213	217
3	101H	124	209	217
3	101H	125	213	217
3	101H	126	213	217
3	101H	127	213	217
3	101H	128	213	217
3	101H	142	213	217
3	101H	143	213	217
3	101H	149	209	217
3	101H	150	213	217
3	101H	151	213	217
3	101H	152	213	217
3	101H	154	213	217
3	101H	156	213	217
3	101H	161	213	217
3	101H	162	213	217
3	101H	164	209	217
3	101H	165	213	217
3	101H	169	213	217
3	101H	170	213	217
3	101H	174	213	217
3	101H	180	213	217
3	101H	182	213	221
3	101H	183	209	213
3	101H	185	209	217
3	101H	189	213	217
3	101H	191	209	213
3	101H	192	213	217
3	101H	195	213	217
3	101H	196	217	217
3	101H	203	209	213
3	101H	210	213	217
3	101H	217	213	217
3	101H	219	209	213
3	101H	222	213	217
3	101H	231	213	217
4	103D	4	235	247
4	103D	10	249	261
4	103D	11	249	261
4	103D	12	249	261
4	103D	13	249	261
4	103D	20	235	247
4	103D	21	235	235
4	103D	23	235	235
4	103D	25	235	247
4	103D	27	261	261
4	103D	30	249	261
4	103D	31	249	261
4	103D	32	261	261
4	103D	37	261	261
4	103D	39	249	261
4	103D	40	249	261
4	103D	42	235	235
4	103D	45	249	261
4	103D	47	235	235
4	103D	48	235	235
4	103D	54	249	261
4	103D	55	235	235
4	103D	56	249	261
4	103D	57	249	261
4	103D	59	249	261
4	103D	64	249	261
4	103D	75	235	247
4	103D	76	249	261
4	103D	77	249	261
4	103D	78	235	261
4	103D	79	249	261
4	103D	81	249	261
4	103D	82	249	261
4	103D	83	235	235
4	103D	84	249	261
4	103D	87	235	249
4	103D	89	235	247
4	103D	92	235	247
4	103D	97	249	261
4	103D	99	235	235
4	103D	100	235	247
4	103D	101	249	261
4	103D	102	235	235
4	103D	103	261	261
4	103D	107	235	235
4	103D	108	249	261
4	103D	111	249	261
4	103D	113	249	261
4	103D	114	235	235
4	103D	124	249	261
4	103D	125	235	235
4	103D	126	249	261
4	103D	127	249	261
4	103D	128	249	261
4	103D	142	235	247
4	103D	143	249	261
4	103D	146	261	261
4	103D	149	249	261
4	103D	150	249	261
4	103D	151	249	261
4	103D	152	249	261
4	103D	154	249	261
4	103D	156	261	261
4	103D	161	249	261
4	103D	162	235	247
4	103D	164	235	247
4	103D	165	235	261
4	103D	169	235	247
4	103D	170	235	235
4	103D	174	249	261
4	103D	180	249	249
4	103D	182	249	261
4	103D	183	261	261
4	103D	191	249	261
4	103D	192	249	261
4	103D	195	261	261
4	103D	196	261	261
4	103D	210	249	261
4	103D	217	249	261
4	103D	222	249	261
4	103D	231	249	261
4	103D	236	247	259
4	103D	241	247	259
4	103D	280	247	259
4	103D	297	247	259
4	103D	2537	247	259
5	104D	4	171	171
5	104D	10	171	171
5	104D	11	171	171
5	104D	12	171	171
5	104D	13	171	171
5	104D	20	171	171
5	104D	21	171	171
5	104D	23	171	171
5	104D	25	171	171
5	104D	27	159	171
5	104D	30	171	171
5	104D	31	171	171
5	104D	32	171	171
5	104D	37	171	171
5	104D	39	171	171
5	104D	40	171	171
5	104D	42	171	171
5	104D	44	171	171
5	104D	45	171	171
5	104D	47	171	171
5	104D	48	171	171
5	104D	54	171	171
5	104D	55	159	171
5	104D	56	159	171
5	104D	57	171	171
5	104D	59	171	171
5	104D	64	171	171
5	104D	75	171	171
5	104D	76	171	171
5	104D	77	171	171
5	104D	78	171	171
5	104D	79	171	171
5	104D	81	171	171
5	104D	82	171	171
5	104D	83	171	171
5	104D	84	171	171
5	104D	87	171	171
5	104D	88	171	171
5	104D	89	171	171
5	104D	92	171	171
5	104D	97	171	171
5	104D	99	159	171
5	104D	100	171	171
5	104D	101	171	171
5	104D	102	171	171
5	104D	103	171	171
5	104D	107	171	171
5	104D	108	171	171
5	104D	111	171	171
5	104D	113	171	171
5	104D	114	171	171
5	104D	122	171	171
5	104D	123	171	171
5	104D	124	171	171
5	104D	125	171	171
5	104D	126	171	171
5	104D	127	171	171
5	104D	128	159	171
5	104D	142	159	171
5	104D	143	159	171
5	104D	145	155	155
5	104D	146	171	171
5	104D	149	171	171
5	104D	150	171	171
5	104D	151	171	171
5	104D	152	171	171
5	104D	154	171	171
5	104D	156	171	171
5	104D	161	171	171
5	104D	162	171	171
5	104D	164	171	171
5	104D	165	171	171
5	104D	169	171	171
5	104D	170	171	171
5	104D	174	171	171
5	104D	180	171	171
5	104D	182	171	171
5	104D	183	171	171
5	104D	185	171	171
5	104D	189	171	171
5	104D	191	171	171
5	104D	192	171	171
5	104D	195	171	171
5	104D	196	171	171
5	104D	203	171	171
5	104D	210	171	171
5	104D	217	171	171
5	104D	219	171	171
5	104D	222	171	171
5	104D	231	171	171
5	104D	235	170	170
5	104D	236	170	170
5	104D	237	170	170
5	104D	238	170	170
5	104D	241	170	170
5	104D	242	170	170
5	104D	243	170	170
5	104D	250	170	170
5	104D	251	170	170
5	104D	257	170	170
5	104D	264	170	170
5	104D	265	170	170
5	104D	269	170	170
5	104D	270	170	170
5	104D	272	170	170
5	104D	280	170	170
5	104D	286	170	170
5	104D	292	170	170
5	104D	297	170	170
5	104D	309	170	170
5	104D	313	170	170
5	104D	332	170	170
5	104D	341	170	170
5	104D	2537	170	170
6	105A	4	226	226
6	105A	10	226	226
6	105A	11	226	226
6	105A	12	220	226
6	105A	13	226	226
6	105A	20	226	226
6	105A	21	226	226
6	105A	23	226	226
6	105A	25	220	226
6	105A	27	226	226
6	105A	30	226	226
6	105A	31	220	226
6	105A	32	226	226
6	105A	37	226	226
6	105A	39	220	226
6	105A	40	220	226
6	105A	42	226	226
6	105A	44	220	226
6	105A	45	226	226
6	105A	47	226	226
6	105A	48	226	226
6	105A	54	220	226
6	105A	55	220	226
6	105A	56	220	226
6	105A	57	226	226
6	105A	59	220	226
6	105A	64	220	226
6	105A	75	226	226
6	105A	76	220	226
6	105A	77	226	226
6	105A	78	226	226
6	105A	79	226	226
6	105A	81	220	226
6	105A	82	226	226
6	105A	83	220	226
6	105A	84	226	226
6	105A	87	226	226
6	105A	89	226	226
6	105A	92	220	226
6	105A	97	226	226
6	105A	99	220	226
6	105A	100	220	226
6	105A	101	226	226
6	105A	102	226	226
6	105A	103	226	226
6	105A	107	220	226
6	105A	108	226	226
6	105A	111	226	226
6	105A	113	226	226
6	105A	114	226	226
6	105A	122	220	226
6	105A	123	226	226
6	105A	124	220	226
6	105A	125	226	226
6	105A	126	220	226
6	105A	127	220	226
6	105A	128	220	226
6	105A	142	220	226
6	105A	143	220	226
6	105A	146	220	226
6	105A	149	226	226
6	105A	150	220	226
6	105A	151	220	226
6	105A	152	220	226
6	105A	154	226	226
6	105A	156	226	226
6	105A	161	220	226
6	105A	162	226	226
6	105A	164	226	226
6	105A	165	226	226
6	105A	169	226	226
6	105A	170	220	226
6	105A	174	226	226
6	105A	180	226	226
6	105A	182	226	226
6	105A	183	226	226
6	105A	185	226	226
6	105A	189	226	226
6	105A	191	220	226
6	105A	192	220	226
6	105A	195	220	226
6	105A	196	220	220
6	105A	203	226	226
6	105A	210	220	226
6	105A	217	220	226
6	105A	219	226	226
6	105A	222	220	226
6	105A	231	226	226
6	105A	235	220	226
6	105A	236	226	226
6	105A	237	226	226
6	105A	238	226	226
6	105A	241	226	226
6	105A	242	226	226
6	105A	243	226	226
6	105A	250	220	226
6	105A	251	220	226
6	105A	257	226	226
6	105A	264	220	226
6	105A	265	226	226
6	105A	269	220	226
6	105A	270	226	226
6	105A	272	226	226
6	105A	286	226	226
6	105A	292	220	226
6	105A	297	220	226
6	105A	309	226	226
6	105A	313	226	226
6	105A	332	226	226
6	105A	341	220	226
6	105A	1405	220	226
6	105A	2537	220	226
7	106D	4	260	260
7	106D	10	260	260
7	106D	11	260	260
7	106D	12	260	260
7	106D	13	260	260
7	106D	20	260	260
7	106D	21	260	260
7	106D	23	260	260
7	106D	25	260	260
7	106D	27	260	260
7	106D	30	260	260
7	106D	31	260	260
7	106D	32	260	260
7	106D	37	260	260
7	106D	39	260	260
7	106D	40	260	260
7	106D	42	260	260
7	106D	44	260	260
7	106D	45	260	260
7	106D	47	260	260
7	106D	48	260	260
7	106D	54	260	260
7	106D	55	260	260
7	106D	56	260	260
7	106D	57	260	260
7	106D	59	260	260
7	106D	64	260	260
7	106D	75	260	260
7	106D	76	260	260
7	106D	77	260	260
7	106D	78	260	260
7	106D	79	260	260
7	106D	81	260	260
7	106D	82	260	260
7	106D	83	260	260
7	106D	84	260	260
7	106D	87	260	260
7	106D	89	260	260
7	106D	92	260	260
7	106D	97	260	260
7	106D	99	260	260
7	106D	100	260	260
7	106D	101	260	260
7	106D	102	260	260
7	106D	103	260	260
7	106D	107	260	260
7	106D	108	260	260
7	106D	111	260	260
7	106D	113	260	260
7	106D	114	260	260
7	106D	122	260	260
7	106D	124	260	260
7	106D	125	260	260
7	106D	126	260	260
7	106D	127	260	260
7	106D	128	260	260
7	106D	142	260	260
7	106D	143	260	260
7	106D	146	260	260
7	106D	149	260	260
7	106D	150	260	260
7	106D	151	260	260
7	106D	152	260	260
7	106D	154	260	260
7	106D	156	260	260
7	106D	161	260	260
7	106D	162	260	260
7	106D	164	260	260
7	106D	165	260	260
7	106D	169	260	260
7	106D	170	260	260
7	106D	174	260	260
7	106D	180	260	260
7	106D	182	260	260
7	106D	183	260	260
7	106D	185	260	260
7	106D	189	260	260
7	106D	191	260	260
7	106D	192	260	260
7	106D	195	260	260
7	106D	196	260	260
7	106D	203	260	260
7	106D	210	260	260
7	106D	217	260	260
7	106D	219	260	260
7	106D	222	260	260
7	106D	231	260	260
7	106D	236	258	258
7	106D	237	258	258
7	106D	238	258	258
7	106D	241	258	258
7	106D	242	258	258
7	106D	243	258	258
7	106D	250	258	258
7	106D	251	258	258
7	106D	257	258	258
7	106D	264	258	258
7	106D	265	258	258
7	106D	269	258	258
7	106D	270	258	258
7	106D	272	258	258
7	106D	280	258	258
7	106D	286	258	258
7	106D	292	258	258
7	106D	297	258	258
7	106D	309	258	258
7	106D	313	258	258
7	106D	332	258	258
7	106D	341	258	258
7	106D	2537	258	258
8	109D	4	212	212
8	109D	10	212	212
8	109D	11	212	212
8	109D	12	212	240
8	109D	13	212	240
8	109D	20	212	236
8	109D	21	212	212
8	109D	23	212	212
8	109D	25	240	240
8	109D	27	212	240
8	109D	30	212	240
8	109D	31	212	220
8	109D	32	212	212
8	109D	37	212	236
8	109D	39	212	240
8	109D	40	212	220
8	109D	42	212	236
8	109D	44	212	212
8	109D	45	212	212
8	109D	47	212	240
8	109D	48	212	220
8	109D	54	212	236
8	109D	55	212	220
8	109D	56	212	240
8	109D	57	212	212
8	109D	59	212	236
8	109D	64	212	212
8	109D	75	220	240
8	109D	76	220	240
8	109D	77	212	240
8	109D	78	212	212
8	109D	79	212	212
8	109D	81	236	240
8	109D	82	212	212
8	109D	83	236	240
8	109D	84	236	240
8	109D	87	212	212
8	109D	89	212	240
8	109D	92	212	240
8	109D	97	212	240
8	109D	99	220	240
8	109D	100	236	240
8	109D	101	236	240
8	109D	102	212	212
8	109D	103	212	212
8	109D	107	212	212
8	109D	111	212	212
8	109D	113	212	212
8	109D	114	212	212
8	109D	122	212	212
8	109D	124	212	236
8	109D	125	212	240
8	109D	126	212	240
8	109D	127	236	240
8	109D	128	220	240
8	109D	142	212	220
8	109D	143	212	220
8	109D	149	212	236
8	109D	150	212	240
8	109D	151	212	220
8	109D	152	236	240
8	109D	154	212	240
8	109D	156	212	212
8	109D	161	236	240
8	109D	162	236	240
8	109D	164	212	212
8	109D	165	240	240
8	109D	169	212	212
8	109D	170	212	236
8	109D	174	212	212
8	109D	180	212	240
8	109D	182	240	240
8	109D	183	212	212
8	109D	185	212	212
8	109D	189	212	212
8	109D	191	212	240
8	109D	192	212	220
8	109D	195	212	240
8	109D	196	236	236
8	109D	203	240	240
8	109D	210	212	212
8	109D	217	212	240
8	109D	219	212	212
8	109D	222	212	240
8	109D	231	212	220
8	109D	236	213	213
8	109D	237	213	213
8	109D	238	213	213
8	109D	241	213	213
8	109D	242	213	213
8	109D	243	213	213
8	109D	250	213	213
8	109D	251	213	213
8	109D	257	213	213
8	109D	264	209	213
8	109D	265	213	213
8	109D	269	213	213
8	109D	270	213	213
8	109D	272	219	219
8	109D	280	213	213
8	109D	286	213	213
8	109D	292	211	213
8	109D	297	213	213
8	109D	309	213	213
8	109D	332	213	213
8	109D	2537	213	213
9	109G	4	171	171
9	109G	10	171	177
9	109G	11	171	171
9	109G	12	171	171
9	109G	13	171	171
9	109G	20	171	177
9	109G	21	171	171
9	109G	23	171	171
9	109G	25	171	171
9	109G	27	171	171
9	109G	31	171	171
9	109G	32	171	171
9	109G	37	171	177
9	109G	39	171	171
9	109G	40	171	171
9	109G	42	171	171
9	109G	45	171	171
9	109G	47	171	177
9	109G	48	171	171
9	109G	54	171	171
9	109G	55	171	171
9	109G	56	171	171
9	109G	57	171	171
9	109G	59	171	171
9	109G	64	171	171
9	109G	75	171	171
9	109G	76	171	171
9	109G	77	171	171
9	109G	78	171	171
9	109G	79	171	171
9	109G	81	171	171
9	109G	82	171	171
9	109G	83	171	177
9	109G	84	171	177
9	109G	87	171	171
9	109G	89	171	171
9	109G	92	171	171
9	109G	97	171	171
9	109G	99	171	171
9	109G	100	171	177
9	109G	101	171	177
9	109G	102	171	171
9	109G	103	171	171
9	109G	107	171	171
9	109G	108	171	171
9	109G	111	171	171
9	109G	113	171	171
9	109G	114	171	171
9	109G	124	171	171
9	109G	125	171	171
9	109G	126	171	171
9	109G	127	171	171
9	109G	128	171	171
9	109G	142	171	171
9	109G	143	171	171
9	109G	149	171	171
9	109G	150	171	177
9	109G	151	171	171
9	109G	152	171	171
9	109G	156	171	171
9	109G	161	171	177
9	109G	162	171	171
9	109G	164	171	171
9	109G	165	171	177
9	109G	169	171	171
9	109G	170	171	171
9	109G	174	171	171
9	109G	180	171	171
9	109G	182	171	171
9	109G	183	171	171
9	109G	185	171	171
9	109G	189	171	171
9	109G	191	171	171
9	109G	192	171	171
9	109G	195	171	171
9	109G	196	171	171
9	109G	203	177	177
9	109G	210	171	177
9	109G	217	171	171
9	109G	219	171	171
9	109G	222	171	177
9	109G	231	171	171
9	109G	235	173	173
9	109G	236	171	171
9	109G	237	171	171
9	109G	238	171	171
9	109G	241	171	171
9	109G	242	171	171
9	109G	243	171	177
9	109G	250	171	171
9	109G	251	171	171
9	109G	257	171	171
9	109G	264	171	171
9	109G	265	171	171
9	109G	269	171	171
9	109G	270	171	173
9	109G	280	171	177
9	109G	286	171	171
9	109G	292	171	171
9	109G	297	171	177
9	109G	309	171	171
9	109G	313	171	171
9	109G	332	171	171
9	109G	1405	169	171
9	109G	2537	171	171
10	110A	10	200	202
10	110A	11	200	202
10	110A	12	200	202
10	110A	13	200	202
10	110A	20	202	202
10	110A	21	200	200
10	110A	23	200	200
10	110A	25	202	202
10	110A	27	202	202
10	110A	30	200	200
10	110A	31	200	202
10	110A	32	200	200
10	110A	37	202	202
10	110A	39	202	202
10	110A	40	202	202
10	110A	42	202	202
10	110A	44	200	200
10	110A	45	200	202
10	110A	47	202	202
10	110A	48	200	200
10	110A	54	202	202
10	110A	55	200	202
10	110A	56	202	202
10	110A	57	200	200
10	110A	59	200	202
10	110A	64	200	202
10	110A	75	200	200
10	110A	76	200	200
10	110A	77	200	202
10	110A	78	202	202
10	110A	79	200	202
10	110A	81	200	202
10	110A	82	200	200
10	110A	83	202	202
10	110A	84	202	202
10	110A	87	200	200
10	110A	88	200	200
10	110A	89	200	202
10	110A	92	202	202
10	110A	97	202	202
10	110A	99	200	200
10	110A	100	202	202
10	110A	101	202	202
10	110A	102	200	200
10	110A	103	200	200
10	110A	107	200	202
10	110A	108	202	202
10	110A	111	200	200
10	110A	113	202	202
10	110A	114	200	200
10	110A	122	202	202
10	110A	124	202	202
10	110A	125	200	200
10	110A	126	200	200
10	110A	127	202	202
10	110A	128	200	200
10	110A	142	202	202
10	110A	143	200	200
10	110A	146	202	202
10	110A	149	200	202
10	110A	150	200	202
10	110A	151	202	202
10	110A	152	202	202
10	110A	154	200	200
10	110A	156	200	202
10	110A	161	202	202
10	110A	162	200	202
10	110A	164	200	200
10	110A	165	202	202
10	110A	169	200	200
10	110A	170	200	202
10	110A	174	202	202
10	110A	175	200	202
10	110A	180	200	202
10	110A	182	200	202
10	110A	183	200	200
10	110A	185	202	202
10	110A	189	200	200
10	110A	191	202	202
10	110A	192	200	202
10	110A	195	200	202
10	110A	196	202	202
10	110A	203	200	202
10	110A	210	202	202
10	110A	212	200	202
10	110A	217	202	202
10	110A	219	202	202
10	110A	222	202	202
10	110A	231	200	202
10	110A	235	202	202
10	110A	236	200	200
10	110A	237	200	202
10	110A	238	202	202
10	110A	241	202	202
10	110A	242	200	202
10	110A	243	202	202
10	110A	250	202	202
10	110A	251	200	202
10	110A	257	202	202
10	110A	264	202	202
10	110A	265	200	202
10	110A	269	202	202
10	110A	270	202	202
10	110A	272	202	202
10	110A	280	202	202
10	110A	286	200	200
10	110A	292	200	202
10	110A	297	202	202
10	110A	309	200	202
10	110A	313	200	202
10	110A	332	200	202
10	110A	341	200	202
10	110A	1405	202	202
10	110A	2537	202	202
11	110Ha	4	173	173
11	110Ha	10	173	173
11	110Ha	11	173	173
11	110Ha	12	173	173
11	110Ha	13	173	173
11	110Ha	20	173	173
11	110Ha	21	173	173
11	110Ha	23	173	173
11	110Ha	25	173	173
11	110Ha	27	173	173
11	110Ha	30	173	173
11	110Ha	31	173	173
11	110Ha	32	173	173
11	110Ha	37	173	173
11	110Ha	39	173	173
11	110Ha	40	173	173
11	110Ha	42	173	173
11	110Ha	44	173	173
11	110Ha	45	173	173
11	110Ha	47	173	173
11	110Ha	48	173	173
11	110Ha	54	173	173
11	110Ha	55	173	173
11	110Ha	56	173	173
11	110Ha	57	173	173
11	110Ha	59	173	173
11	110Ha	64	173	173
11	110Ha	75	173	173
11	110Ha	76	173	173
11	110Ha	77	173	173
11	110Ha	78	173	173
11	110Ha	79	173	173
11	110Ha	81	173	173
11	110Ha	82	173	173
11	110Ha	83	173	173
11	110Ha	84	173	173
11	110Ha	87	173	173
11	110Ha	88	173	173
11	110Ha	89	173	173
11	110Ha	92	173	173
11	110Ha	97	173	173
11	110Ha	99	173	173
11	110Ha	100	173	173
11	110Ha	101	173	173
11	110Ha	102	173	173
11	110Ha	103	173	173
11	110Ha	107	173	173
11	110Ha	108	173	173
11	110Ha	111	173	173
11	110Ha	113	173	173
11	110Ha	114	173	173
11	110Ha	122	173	173
11	110Ha	124	173	173
11	110Ha	125	173	173
11	110Ha	126	173	173
11	110Ha	127	173	173
11	110Ha	128	173	173
11	110Ha	142	173	173
11	110Ha	143	173	173
11	110Ha	146	173	173
11	110Ha	149	173	173
11	110Ha	150	173	173
11	110Ha	151	173	173
11	110Ha	152	173	173
11	110Ha	154	173	173
11	110Ha	156	173	173
11	110Ha	161	173	173
11	110Ha	162	173	173
11	110Ha	164	173	173
11	110Ha	165	173	173
11	110Ha	169	173	173
11	110Ha	170	173	173
11	110Ha	174	173	173
11	110Ha	180	173	173
11	110Ha	182	173	173
11	110Ha	183	173	173
11	110Ha	185	173	173
11	110Ha	189	173	173
11	110Ha	192	173	173
11	110Ha	195	173	173
11	110Ha	196	173	173
11	110Ha	203	173	173
11	110Ha	210	173	173
11	110Ha	217	173	173
11	110Ha	219	173	173
11	110Ha	222	173	173
11	110Ha	231	173	173
11	110Ha	235	172	172
11	110Ha	236	172	172
11	110Ha	237	172	172
11	110Ha	238	172	172
11	110Ha	241	172	172
11	110Ha	242	172	172
11	110Ha	243	172	172
11	110Ha	250	172	172
11	110Ha	251	172	172
11	110Ha	257	172	172
11	110Ha	264	172	172
11	110Ha	265	172	172
11	110Ha	269	172	172
11	110Ha	270	172	172
11	110Ha	272	172	172
11	110Ha	280	172	172
11	110Ha	286	172	172
11	110Ha	292	172	172
11	110Ha	297	172	172
11	110Ha	309	172	172
11	110Ha	313	172	172
11	110Ha	332	172	172
11	110Ha	341	172	172
11	110Ha	1405	172	172
11	110Ha	2537	172	172
12	111A	4	215	215
12	111A	10	215	215
12	111A	11	215	216
12	111A	12	215	215
12	111A	13	215	215
12	111A	20	215	215
12	111A	21	215	215
12	111A	23	215	215
12	111A	25	215	216
12	111A	27	215	215
12	111A	30	215	216
12	111A	31	215	216
12	111A	32	215	215
12	111A	37	215	215
12	111A	39	215	216
12	111A	40	215	216
12	111A	42	215	215
12	111A	44	215	215
12	111A	45	215	215
12	111A	47	215	215
12	111A	48	215	215
12	111A	54	215	215
12	111A	55	215	215
12	111A	56	215	216
12	111A	57	215	215
12	111A	59	215	215
12	111A	64	215	215
12	111A	75	215	215
12	111A	76	215	216
12	111A	77	215	216
12	111A	78	215	215
12	111A	79	215	215
12	111A	81	215	215
12	111A	82	215	215
12	111A	83	215	216
12	111A	84	215	215
12	111A	87	215	215
12	111A	88	215	215
12	111A	89	215	216
12	111A	92	215	215
12	111A	97	215	215
12	111A	99	215	216
12	111A	100	215	216
12	111A	101	215	216
12	111A	102	215	215
12	111A	103	215	215
12	111A	107	215	215
12	111A	108	215	215
12	111A	111	215	215
12	111A	113	215	215
12	111A	114	215	215
12	111A	122	215	216
12	111A	123	215	216
12	111A	124	215	216
12	111A	125	215	215
12	111A	126	215	215
12	111A	127	215	215
12	111A	128	215	216
12	111A	142	215	216
12	111A	143	215	215
12	111A	145	215	215
12	111A	146	215	215
12	111A	149	215	215
12	111A	150	215	216
12	111A	151	215	215
12	111A	152	215	216
12	111A	154	215	215
12	111A	156	215	215
12	111A	161	215	216
12	111A	162	215	215
12	111A	164	215	215
12	111A	165	215	216
12	111A	169	215	215
12	111A	170	215	216
12	111A	174	215	215
12	111A	175	215	216
12	111A	180	215	215
12	111A	182	215	216
12	111A	183	215	215
12	111A	185	215	216
12	111A	189	215	215
12	111A	191	215	215
12	111A	192	215	215
12	111A	195	215	215
12	111A	196	215	215
12	111A	203	215	216
12	111A	210	215	215
12	111A	213	215	216
12	111A	217	215	216
12	111A	219	215	215
12	111A	222	215	216
12	111A	231	215	215
13	111G	4	217	217
13	111G	10	217	217
13	111G	11	217	217
13	111G	12	217	217
13	111G	13	217	217
13	111G	20	217	217
13	111G	21	217	217
13	111G	23	217	217
13	111G	25	217	217
13	111G	27	217	217
13	111G	30	217	217
13	111G	31	217	217
13	111G	32	217	217
13	111G	37	217	217
13	111G	39	217	217
13	111G	40	217	217
13	111G	42	217	217
13	111G	44	217	217
13	111G	45	217	217
13	111G	47	217	217
13	111G	48	217	217
13	111G	54	217	217
13	111G	55	217	217
13	111G	56	217	217
13	111G	57	217	217
13	111G	59	217	217
13	111G	64	217	217
13	111G	75	217	217
13	111G	76	217	217
13	111G	77	217	217
13	111G	78	217	217
13	111G	79	217	217
13	111G	81	217	217
13	111G	82	217	217
13	111G	83	217	217
13	111G	84	217	217
13	111G	87	217	217
13	111G	88	217	217
13	111G	89	217	217
13	111G	92	217	217
13	111G	97	217	217
13	111G	99	217	217
13	111G	100	217	217
13	111G	101	217	217
13	111G	102	217	217
13	111G	103	217	219
13	111G	107	217	217
13	111G	108	217	217
13	111G	111	217	217
13	111G	113	217	217
13	111G	114	217	217
13	111G	122	217	217
13	111G	123	217	217
13	111G	124	217	217
13	111G	125	217	217
13	111G	126	217	217
13	111G	127	217	217
13	111G	128	217	217
13	111G	142	217	217
13	111G	143	217	217
13	111G	146	217	217
13	111G	149	217	217
13	111G	150	217	217
13	111G	151	217	217
13	111G	152	217	217
13	111G	154	217	217
13	111G	156	217	217
13	111G	160	217	217
13	111G	161	217	217
13	111G	162	217	217
13	111G	164	217	217
13	111G	165	217	217
13	111G	169	217	217
13	111G	170	217	217
13	111G	174	217	217
13	111G	175	217	217
13	111G	180	217	217
13	111G	182	217	217
13	111G	183	217	217
13	111G	185	217	217
13	111G	189	217	217
13	111G	191	217	217
13	111G	192	217	217
13	111G	195	217	217
13	111G	196	217	217
13	111G	203	217	217
13	111G	210	217	217
13	111G	213	215	215
13	111G	214	217	219
13	111G	217	217	217
13	111G	219	217	217
13	111G	222	217	217
13	111G	225	217	217
13	111G	231	217	217
13	111G	235	217	217
13	111G	236	217	217
13	111G	237	217	217
13	111G	238	217	217
13	111G	241	217	217
13	111G	242	217	217
13	111G	243	217	217
13	111G	250	217	217
13	111G	251	217	217
13	111G	257	217	217
13	111G	264	217	217
13	111G	265	217	217
13	111G	269	217	217
13	111G	270	217	217
13	111G	272	217	217
13	111G	280	217	217
13	111G	286	217	217
13	111G	292	217	219
13	111G	297	217	217
13	111G	309	217	217
13	111G	313	217	217
13	111G	332	217	217
13	111G	341	217	217
13	111G	1405	217	217
13	111G	2537	217	217
14	111H	4	263	263
14	111H	10	263	263
14	111H	11	263	263
14	111H	12	263	263
14	111H	13	263	263
14	111H	20	263	263
14	111H	21	263	263
14	111H	23	263	263
14	111H	25	263	263
14	111H	27	263	263
14	111H	31	263	263
14	111H	32	263	263
14	111H	37	263	263
14	111H	39	263	263
14	111H	40	263	263
14	111H	42	263	263
14	111H	44	263	263
14	111H	47	263	263
14	111H	48	263	263
14	111H	54	263	263
14	111H	55	263	263
14	111H	56	263	263
14	111H	57	263	263
14	111H	59	263	263
14	111H	64	263	263
14	111H	75	263	263
14	111H	76	263	263
14	111H	77	263	263
14	111H	78	263	263
14	111H	79	263	263
14	111H	81	263	263
14	111H	82	263	263
14	111H	83	263	263
14	111H	84	263	263
14	111H	87	263	263
14	111H	89	263	263
14	111H	92	263	263
14	111H	97	263	263
14	111H	99	263	263
14	111H	100	263	263
14	111H	101	263	263
14	111H	102	263	263
14	111H	103	263	263
14	111H	107	263	263
14	111H	108	263	263
14	111H	111	263	263
14	111H	113	263	263
14	111H	114	263	263
14	111H	124	263	263
14	111H	125	263	263
14	111H	126	263	263
14	111H	127	263	263
14	111H	128	263	263
14	111H	142	263	263
14	111H	143	263	263
14	111H	149	263	263
14	111H	150	263	263
14	111H	151	263	263
14	111H	156	263	263
14	111H	161	263	263
14	111H	162	263	263
14	111H	164	263	263
14	111H	165	263	263
14	111H	169	263	263
14	111H	170	263	263
14	111H	189	263	263
14	111H	192	263	263
14	111H	195	263	263
14	111H	203	263	263
14	111H	210	263	263
14	111H	217	263	263
14	111H	231	263	263
14	111H	236	262	262
14	111H	237	262	262
14	111H	241	262	262
14	111H	242	262	262
14	111H	243	262	262
14	111H	250	262	262
14	111H	251	262	262
14	111H	257	262	262
14	111H	264	262	262
14	111H	265	262	262
14	111H	269	262	262
14	111H	270	262	262
14	111H	272	262	262
14	111H	280	262	262
14	111H	286	262	262
14	111H	297	262	262
14	111H	313	262	262
14	111H	332	262	262
14	111H	2537	262	262
15	112G	4	239	243
15	112G	10	239	239
15	112G	11	239	239
15	112G	12	239	239
15	112G	13	239	239
15	112G	20	239	239
15	112G	21	239	239
15	112G	23	239	243
15	112G	25	239	239
15	112G	27	239	239
15	112G	31	239	239
15	112G	39	239	239
15	112G	40	239	239
15	112G	47	239	239
15	112G	48	239	239
15	112G	55	239	239
15	112G	56	239	239
15	112G	57	239	239
15	112G	59	239	243
15	112G	64	239	239
15	112G	75	239	239
15	112G	76	239	239
15	112G	77	239	239
15	112G	78	239	239
15	112G	79	239	239
15	112G	81	239	239
15	112G	82	239	243
15	112G	83	239	243
15	112G	89	239	239
15	112G	92	239	243
15	112G	97	239	239
15	112G	100	239	239
15	112G	101	239	243
15	112G	102	239	239
15	112G	107	239	239
15	112G	108	239	239
15	112G	111	239	239
15	112G	113	239	239
15	112G	114	239	239
15	112G	124	239	243
15	112G	125	239	239
15	112G	126	239	239
15	112G	127	239	243
15	112G	128	239	239
15	112G	142	239	239
15	112G	143	239	239
15	112G	149	239	239
15	112G	150	239	239
15	112G	151	239	239
15	112G	161	239	239
15	112G	162	239	239
15	112G	164	239	239
15	112G	165	239	239
15	112G	169	239	243
15	112G	170	239	239
15	112G	182	239	239
15	112G	192	239	239
15	112G	195	239	239
15	112G	219	239	239
15	112G	222	239	239
15	112G	231	239	239
15	112G	237	239	239
15	112G	241	239	239
15	112G	242	239	239
15	112G	243	239	239
15	112G	250	239	243
15	112G	251	239	239
15	112G	257	239	239
15	112G	265	239	239
15	112G	272	239	239
15	112G	280	239	239
15	112G	286	239	243
15	112G	297	239	239
15	112G	313	239	239
15	112G	332	239	239
15	112G	2537	239	239
16	115Aa	4	178	308
16	115Aa	10	178	308
16	115Aa	11	178	308
16	115Aa	12	178	308
16	115Aa	13	178	308
16	115Aa	20	178	308
16	115Aa	21	178	308
16	115Aa	23	178	308
16	115Aa	25	178	308
16	115Aa	27	178	308
16	115Aa	30	178	308
16	115Aa	31	178	308
16	115Aa	32	178	308
16	115Aa	37	178	308
16	115Aa	39	178	308
16	115Aa	40	178	308
16	115Aa	42	178	308
16	115Aa	44	178	178
16	115Aa	45	178	308
16	115Aa	47	178	308
16	115Aa	48	178	308
16	115Aa	54	308	308
16	115Aa	55	178	308
16	115Aa	56	178	308
16	115Aa	57	178	308
16	115Aa	59	178	308
16	115Aa	64	178	308
16	115Aa	75	178	308
16	115Aa	76	178	308
16	115Aa	77	178	308
16	115Aa	78	178	308
16	115Aa	79	178	178
16	115Aa	81	178	308
16	115Aa	82	178	308
16	115Aa	83	178	308
16	115Aa	87	178	308
16	115Aa	89	178	308
16	115Aa	92	178	308
16	115Aa	97	178	308
16	115Aa	99	178	308
16	115Aa	100	178	308
16	115Aa	101	178	308
16	115Aa	102	178	308
16	115Aa	103	178	308
16	115Aa	107	178	308
16	115Aa	108	178	308
16	115Aa	111	178	308
16	115Aa	113	178	308
16	115Aa	114	178	308
16	115Aa	124	178	308
16	115Aa	125	178	308
16	115Aa	126	178	308
16	115Aa	127	178	308
16	115Aa	128	178	308
16	115Aa	142	178	308
16	115Aa	143	178	308
16	115Aa	149	178	308
16	115Aa	150	178	308
16	115Aa	151	178	308
16	115Aa	156	178	308
16	115Aa	161	178	308
16	115Aa	162	178	308
16	115Aa	164	178	308
16	115Aa	165	178	308
16	115Aa	169	178	178
16	115Aa	170	178	308
16	115Aa	174	178	308
16	115Aa	180	178	308
16	115Aa	182	178	308
16	115Aa	183	178	308
16	115Aa	185	178	308
16	115Aa	189	178	308
16	115Aa	191	178	308
16	115Aa	192	178	308
16	115Aa	195	178	308
16	115Aa	196	178	308
16	115Aa	203	178	308
16	115Aa	210	178	308
16	115Aa	217	178	308
16	115Aa	219	178	308
16	115Aa	222	178	308
16	115Aa	231	178	308
16	115Aa	235	178	178
16	115Aa	236	178	178
16	115Aa	237	178	178
16	115Aa	238	178	178
16	115Aa	241	178	178
16	115Aa	242	178	178
16	115Aa	243	178	178
16	115Aa	250	178	178
16	115Aa	251	178	178
16	115Aa	257	178	178
16	115Aa	265	178	178
16	115Aa	269	178	178
16	115Aa	270	178	178
16	115Aa	272	178	178
16	115Aa	280	178	178
16	115Aa	286	178	178
16	115Aa	292	178	178
16	115Aa	297	178	178
16	115Aa	309	178	178
16	115Aa	313	178	178
16	115Aa	332	178	178
16	115Aa	341	178	178
16	115Aa	1405	178	178
16	115Aa	2537	178	178
17	115Ab	236	155	155
17	115Ab	237	155	155
17	115Ab	238	155	155
17	115Ab	241	155	155
17	115Ab	242	155	155
17	115Ab	243	155	155
17	115Ab	250	155	155
17	115Ab	251	155	155
17	115Ab	257	155	155
17	115Ab	264	155	155
17	115Ab	265	155	155
17	115Ab	269	155	155
17	115Ab	270	155	155
17	115Ab	272	155	155
17	115Ab	280	155	155
17	115Ab	286	155	155
17	115Ab	292	155	155
17	115Ab	297	155	155
17	115Ab	309	155	155
17	115Ab	313	155	155
17	115Ab	332	155	155
17	115Ab	2537	155	155
18	115F	236	369	379
18	115F	237	369	379
18	115F	241	369	369
18	115F	242	369	379
18	115F	243	369	379
18	115F	250	369	369
18	115F	251	369	379
18	115F	257	369	369
18	115F	264	369	379
18	115F	265	369	379
18	115F	270	369	369
18	115F	272	369	369
18	115F	280	369	379
18	115F	286	369	379
18	115F	297	369	379
18	115F	313	369	369
18	115F	332	369	379
18	115F	2537	369	379
19	116A	4	241	241
19	116A	11	241	241
19	116A	12	241	241
19	116A	13	241	241
19	116A	20	241	241
19	116A	21	241	241
19	116A	23	241	241
19	116A	25	241	241
19	116A	27	241	241
19	116A	30	241	241
19	116A	31	241	241
19	116A	32	241	241
19	116A	37	241	241
19	116A	39	241	241
19	116A	40	241	241
19	116A	42	241	241
19	116A	44	241	241
19	116A	45	241	241
19	116A	47	241	241
19	116A	48	241	241
19	116A	55	241	241
19	116A	56	241	241
19	116A	57	241	241
19	116A	59	241	241
19	116A	64	241	241
19	116A	75	241	241
19	116A	76	241	241
19	116A	77	241	241
19	116A	78	241	241
19	116A	79	241	241
19	116A	81	241	241
19	116A	82	241	241
19	116A	83	241	241
19	116A	84	241	241
19	116A	87	241	241
19	116A	88	241	241
19	116A	89	241	241
19	116A	92	241	241
19	116A	97	241	241
19	116A	99	241	241
19	116A	100	241	241
19	116A	101	241	241
19	116A	102	241	241
19	116A	103	241	241
19	116A	107	241	241
19	116A	108	241	241
19	116A	111	241	241
19	116A	113	241	241
19	116A	114	241	241
19	116A	122	241	241
19	116A	123	241	241
19	116A	124	241	241
19	116A	125	241	241
19	116A	126	241	241
19	116A	127	241	241
19	116A	128	241	241
19	116A	142	241	241
19	116A	143	241	241
19	116A	145	241	241
19	116A	146	241	241
19	116A	149	241	241
19	116A	150	241	241
19	116A	151	241	241
19	116A	152	241	241
19	116A	154	241	241
19	116A	156	241	241
19	116A	161	241	241
19	116A	162	241	241
19	116A	164	241	241
19	116A	165	241	241
19	116A	169	241	241
19	116A	170	241	241
19	116A	174	241	241
19	116A	175	241	241
19	116A	180	241	241
19	116A	182	241	241
19	116A	183	241	241
19	116A	185	241	241
19	116A	189	241	241
19	116A	191	241	241
19	116A	192	241	241
19	116A	195	241	241
19	116A	196	241	241
19	116A	203	241	241
19	116A	210	241	241
19	116A	213	241	241
19	116A	214	241	241
19	116A	217	241	241
19	116A	219	241	241
19	116A	222	241	241
19	116A	231	241	241
19	116A	236	243	243
19	116A	237	243	243
19	116A	241	243	243
19	116A	242	243	243
19	116A	243	243	243
19	116A	250	243	243
19	116A	257	243	243
19	116A	264	243	243
19	116A	265	243	243
19	116A	269	243	243
19	116A	270	243	243
19	116A	272	243	243
19	116A	286	243	243
19	116A	297	243	243
19	116A	309	243	243
19	116A	313	243	243
19	116A	332	243	243
19	116A	341	243	243
19	116A	2537	243	243
20	116D	4	213	213
20	116D	10	213	213
20	116D	11	213	213
20	116D	12	213	213
20	116D	13	213	213
20	116D	20	213	213
20	116D	21	213	213
20	116D	23	213	213
20	116D	25	213	213
20	116D	27	213	213
20	116D	30	213	213
20	116D	31	213	213
20	116D	32	213	213
20	116D	37	213	213
20	116D	39	213	213
20	116D	40	213	213
20	116D	42	213	213
20	116D	44	213	213
20	116D	45	213	213
20	116D	47	213	213
20	116D	48	213	213
20	116D	54	213	213
20	116D	55	213	213
20	116D	56	213	213
20	116D	57	213	213
20	116D	59	213	213
20	116D	64	213	213
20	116D	75	213	213
20	116D	76	213	213
20	116D	77	213	213
20	116D	78	213	213
20	116D	79	213	213
20	116D	81	213	213
20	116D	82	213	213
20	116D	83	213	213
20	116D	84	213	213
20	116D	87	213	213
20	116D	89	213	213
20	116D	92	213	213
20	116D	97	213	213
20	116D	99	213	213
20	116D	100	213	213
20	116D	101	213	213
20	116D	102	213	213
20	116D	103	213	213
20	116D	107	213	213
20	116D	108	213	213
20	116D	111	213	213
20	116D	113	213	213
20	116D	114	213	213
20	116D	124	213	213
20	116D	125	213	213
20	116D	126	213	213
20	116D	127	213	213
20	116D	128	213	213
20	116D	142	213	213
20	116D	143	213	213
20	116D	149	213	213
20	116D	150	213	213
20	116D	151	213	213
20	116D	154	213	213
20	116D	156	213	213
20	116D	161	213	213
20	116D	162	213	213
20	116D	164	213	213
20	116D	165	213	213
20	116D	169	213	213
20	116D	170	213	213
20	116D	174	213	213
20	116D	180	213	213
20	116D	182	213	213
20	116D	183	213	213
20	116D	185	213	213
20	116D	189	213	213
20	116D	191	213	213
20	116D	192	213	213
20	116D	195	213	213
20	116D	196	213	213
20	116D	203	213	213
20	116D	210	213	213
20	116D	217	213	213
20	116D	219	213	213
20	116D	222	213	213
20	116D	231	213	213
20	116D	236	212	212
20	116D	237	212	212
20	116D	238	212	212
20	116D	241	212	212
20	116D	242	212	212
20	116D	243	212	212
20	116D	250	212	212
20	116D	251	212	212
20	116D	257	212	212
20	116D	264	212	212
20	116D	265	212	212
20	116D	269	212	212
20	116D	270	212	212
20	116D	272	212	212
20	116D	280	212	212
20	116D	286	212	212
20	116D	292	212	212
20	116D	297	212	212
20	116D	309	212	212
20	116D	313	212	212
20	116D	332	212	212
20	116D	1405	212	212
20	116D	2537	212	212
21	11A	4	239	239
21	11A	10	239	239
21	11A	11	239	239
21	11A	12	239	245
21	11A	13	239	239
21	11A	20	239	239
21	11A	21	239	239
21	11A	23	239	239
21	11A	25	239	245
21	11A	27	239	239
21	11A	30	239	245
21	11A	31	239	239
21	11A	32	239	239
21	11A	37	239	239
21	11A	39	239	245
21	11A	40	239	239
21	11A	42	239	239
21	11A	44	239	245
21	11A	45	239	239
21	11A	47	239	239
21	11A	48	239	239
21	11A	54	239	245
21	11A	55	239	239
21	11A	56	239	239
21	11A	57	239	239
21	11A	59	239	239
21	11A	64	239	239
21	11A	75	239	239
21	11A	76	239	239
21	11A	77	239	239
21	11A	78	239	239
21	11A	79	239	239
21	11A	81	239	245
21	11A	82	239	239
21	11A	83	239	245
21	11A	84	239	245
21	11A	87	239	239
21	11A	88	239	239
21	11A	89	239	239
21	11A	92	239	239
21	11A	97	239	245
21	11A	99	239	239
21	11A	100	239	245
21	11A	101	239	245
21	11A	102	239	239
21	11A	103	239	239
21	11A	107	239	239
21	11A	108	239	245
21	11A	111	239	245
21	11A	113	239	245
21	11A	114	239	239
21	11A	122	239	239
21	11A	123	239	245
21	11A	124	239	245
21	11A	125	239	239
21	11A	126	239	239
21	11A	127	239	239
21	11A	128	239	239
21	11A	142	239	239
21	11A	143	239	239
21	11A	146	239	239
21	11A	149	239	239
21	11A	150	239	239
21	11A	151	239	239
21	11A	152	239	245
21	11A	154	239	239
21	11A	156	239	239
21	11A	161	239	245
21	11A	162	239	245
21	11A	164	239	239
21	11A	165	239	245
21	11A	169	239	239
21	11A	170	239	239
21	11A	174	239	245
21	11A	180	239	239
21	11A	182	239	245
21	11A	183	239	239
21	11A	185	239	239
21	11A	189	239	239
21	11A	191	239	245
21	11A	192	239	239
21	11A	195	239	239
21	11A	196	239	239
21	11A	203	239	245
21	11A	210	239	239
21	11A	217	239	239
21	11A	219	239	245
21	11A	222	239	239
21	11A	231	239	239
21	11A	235	237	237
21	11A	236	237	237
21	11A	237	237	237
21	11A	238	237	237
21	11A	241	237	243
21	11A	242	237	243
21	11A	243	237	237
21	11A	250	237	237
21	11A	251	237	237
21	11A	257	237	243
21	11A	264	237	237
21	11A	265	237	237
21	11A	269	237	237
21	11A	270	237	243
21	11A	272	237	237
21	11A	280	237	237
21	11A	286	237	237
21	11A	297	237	243
21	11A	309	237	243
21	11A	313	237	243
21	11A	332	237	237
21	11A	341	237	243
21	11A	2537	237	237
22	120A	4	178	178
22	120A	10	174	178
[truncated: 15,180 more rows]
