# Supplementary material for: Towards a Genetic Linkage Map of the California Condor, an Endangered New World Vulture Species
Source: Animals (Basel). 2022 Nov 24;12(23):3266. doi: 10.3390/ani12233266 (PMC9739316; doi:10.3390/ani12233266)
Supplement: Supplementary file 1 [file animals-12-03266-s001.zip › Supplementary Information S5 revised.txt]

Supplementary Information S5: Two-point linkage analysis results


50400 bytes allocated in orders_morecore

3024000 bytes allocated in morecore

Option chosen: twopoint

Current values for parameters:

par_file = condor_infr.gen
dat_file = condor_infr.dat
gen_file = condor_infr.gen
ord_file = condor_infr.ord
nb_our_alloc = 3000000    [# bytes reserved for our_alloc]
SEX_EQ = 1   [0 = sex specific analysis, 1 = sex equal]
TOL = 0.010000
PUK_NUM_ORDERS_TOL = 6
PK_NUM_ORDERS_TOL = 8
PUK_LIKE_TOL = 3.000
PK_LIKE_TOL = 3.000
use_ord_file = 0
write_ord_file = 0
use_haps = 1


100F                101H                103D                104D                109D                
109G                112G                115Aa               120A                120D                
120H                123H                124D                124H                125G                
129H                132H                133H                143H                14A                 
151F                153F                157F                157G                165F                
166F                175Ab               17G                 180G                188F                
192F                195F                21F                 220F                233F                
23b                 252F                253Fb               257Fa               30H                 
35A                 35F                 37G                 38F                 39F                 
42Da                47G                 51H                 54G                 57D                 
58F                 60A                 63G                 63H                 64G                 
65F                 73F                 74F                 74H                 79H                 
82F                 82G                 85F                 86F                 92D                 
92H                 94G                 97G                 9Fb                 CH262_13G5_1        
Ch262-87L14_2       A20                 A8                  B7                  C5                  
D10                 D126                D24                 D6                  D9                  
G8                  H106                H115                H127                H238                
H269                H3                  H6                  110A                111A                
11A                 121A                129H                134Ab               135A                
145A                150A                156A                15A                 167A                
174A                176A                20D                 21A                 21D                 
27H                 30A                 33A                 36D                 41A                 
42Db                47G                 56A                 58A                 5A                  
66A                 98A                 9A                  


115Aa   101H  rec. fracs.=    0.05,   lods =    5.05
   1.21   3.98   5.05   4.68   3.96   3.14   2.32   1.58   0.96   0.49   0.15   0.00

120A   101H  rec. fracs.=    0.05,   lods =    3.43
   0.91   2.75   3.43   3.14   2.61   2.00   1.40   0.85   0.44   0.18   0.04   0.00

120A   115Aa  rec. fracs.=    0.06,   lods =    4.73
  -0.59   3.13   4.71   4.40   3.62   2.69   1.76   0.97   0.42   0.13   0.02   0.00

153F   115Aa  rec. fracs.=    0.05,   lods =    3.59
  -0.29   2.48   3.59   3.27   2.60   1.85   1.13   0.56   0.20   0.04   0.00   0.00

153F   120A  rec. fracs.=    0.02,   lods =    6.51
   5.70   6.46   6.10   5.09   3.98   2.87   1.85   1.01   0.45   0.15   0.03   0.00

157G   124D  rec. fracs.=    0.05,   lods =    4.55
   3.31   4.23   4.55   4.36   4.02   3.59   3.10   2.55   1.94   1.27   0.57   0.00

157G   125G  rec. fracs.=    0.08,   lods =    6.81
   2.42   5.28   6.71   6.75   6.37   5.79   5.07   4.25   3.32   2.31   1.20   0.00

188F   129H  rec. fracs.=    0.00,   lods =    3.91
   3.91   3.86   3.62   3.32   3.00   2.65   2.29   1.90   1.48   1.03   0.54   0.00

195F   115Aa  rec. fracs.=    0.09,   lods =    3.64
  -6.89  -0.21   3.26   3.61   3.13   2.37   1.56   0.85   0.35   0.09   0.01   0.00

195F   120A  rec. fracs.=    0.03,   lods =    7.14
   5.11   6.82   6.95   5.97   4.78   3.54   2.36   1.35   0.62   0.22   0.05   0.00

195F   153F  rec. fracs.=    0.02,   lods =    6.22
   5.40   6.17   5.82   4.83   3.75   2.68   1.69   0.90   0.37   0.10   0.02   0.00

195F   188F  rec. fracs.=    0.00,   lods =    3.31
   3.30   3.22   2.85   2.39   1.94   1.49   1.06   0.68   0.38   0.17   0.04   0.00

38F   101H  rec. fracs.=    0.02,   lods =    5.66
   4.80   5.59   5.36   4.51   3.58   2.66   1.81   1.07   0.53   0.20   0.04   0.00

38F   115Aa  rec. fracs.=    0.03,   lods =    7.80
   4.51   7.15   7.67   6.63   5.26   3.84   2.49   1.36   0.57   0.17   0.03   0.00

38F   120A  rec. fracs.=    0.01,   lods =    8.83
   8.11   8.81   8.21   6.89   5.47   4.07   2.75   1.61   0.78   0.29   0.07   0.00

38F   153F  rec. fracs.=    0.00,   lods =    8.43
   8.40   8.16   7.08   5.75   4.44   3.19   2.06   1.13   0.49   0.16   0.03   0.00

38F   188F  rec. fracs.=    0.00,   lods =    3.91
   3.90   3.81   3.39   2.86   2.34   1.83   1.33   0.88   0.51   0.24   0.06   0.00

38F   195F  rec. fracs.=    0.07,   lods =    5.67
  -2.69   2.96   5.57   5.42   4.57   3.49   2.38   1.38   0.65   0.23   0.05   0.00

39F   109D  rec. fracs.=    0.15,   lods =    6.61
 -11.06  -1.30   4.63   6.27   6.61   6.38   5.82   5.01   4.00   2.82   1.48   0.00

42Da   101H  rec. fracs.=    0.00,   lods =    3.01
   3.01   2.96   2.74   2.47   2.18   1.87   1.56   1.22   0.88   0.52   0.17   0.00

63G   101H  rec. fracs.=    0.02,   lods =    5.66
   4.80   5.59   5.36   4.51   3.58   2.66   1.81   1.07   0.53   0.20   0.04   0.00

63G   115Aa  rec. fracs.=    0.04,   lods =    6.70
   1.81   5.46   6.69   5.97   4.80   3.52   2.29   1.25   0.53   0.16   0.03   0.00

63G   120A  rec. fracs.=    0.01,   lods =    8.83
   8.11   8.81   8.21   6.89   5.47   4.07   2.75   1.61   0.78   0.29   0.07   0.00

63G   153F  rec. fracs.=    0.00,   lods =    8.43
   8.40   8.16   7.08   5.75   4.44   3.19   2.06   1.13   0.49   0.16   0.03   0.00

63G   195F  rec. fracs.=    0.07,   lods =    5.67
  -2.69   2.96   5.57   5.42   4.57   3.49   2.38   1.38   0.65   0.23   0.05   0.00

63G   38F  rec. fracs.=    0.02,   lods =   12.50
   9.61  12.12  12.05  10.27   8.19   6.08   4.08   2.35   1.07   0.36   0.07   0.00

64G   129H  rec. fracs.=    0.00,   lods =    3.61
   3.61   3.56   3.35   3.06   2.77   2.45   2.11   1.75   1.37   0.95   0.50   0.00

64G   188F  rec. fracs.=    0.00,   lods =    3.61
   3.61   3.56   3.35   3.06   2.77   2.45   2.11   1.75   1.37   0.95   0.50   0.00

74F   58F  rec. fracs.=    0.10,   lods =    3.20
   0.01   1.94   3.02   3.20   3.10   2.88   2.57   2.19   1.74   1.23   0.65   0.00

92D   47G  rec. fracs.=    0.03,   lods =    6.77
   5.72   6.59   6.70   6.24   5.63   4.93   4.18   3.36   2.48   1.56   0.64   0.00

9Fb   101H  rec. fracs.=    0.06,   lods =    4.01
   0.01   2.80   4.00   3.78   3.21   2.52   1.82   1.18   0.66   0.29   0.07   0.00

9Fb   17G  rec. fracs.=    0.04,   lods =    3.27
   2.11   3.00   3.25   2.97   2.57   2.12   1.66   1.23   0.84   0.52   0.24   0.00

D10   21F  rec. fracs.=    0.14,   lods =    4.14
  -4.48   0.39   3.30   4.04   4.13   3.92   3.54   3.03   2.41   1.70   0.90   0.00

D10   79H  rec. fracs.=    0.08,   lods =    3.64
   0.61   2.53   3.53   3.63   3.45   3.15   2.76   2.32   1.82   1.27   0.66   0.00

D126   Ch262-87L14_2  rec. fracs.=    0.03,   lods =    8.52
   7.52   8.37   8.39   7.81   7.07   6.23   5.32   4.35   3.30   2.20   1.05   0.00

D6   21F  rec. fracs.=    0.14,   lods =    3.67
  -5.08  -0.20   2.74   3.53   3.67   3.51   3.19   2.74   2.19   1.55   0.82   0.00

D6   79H  rec. fracs.=    0.09,   lods =    3.38
   0.31   2.23   3.25   3.37   3.22   2.94   2.59   2.17   1.70   1.19   0.62   0.00

D6   D10  rec. fracs.=    0.00,   lods =   25.59
  25.55  25.20  23.61  21.53  19.33  17.02  14.56  11.95   9.16   6.17   2.99   0.00

D9   112G  rec. fracs.=    0.00,   lods =    4.82
   4.81   4.74   4.42   3.99   3.55   3.07   2.57   2.03   1.46   0.87   0.32   0.00

50400 bytes allocated in orders_morecore

H238   B7  rec. fracs.=    0.00,   lods =    8.13
   8.12   8.01   7.53   6.89   6.22   5.51   4.75   3.95   3.08   2.14   1.12   0.00

111A   143H  rec. fracs.=    0.15,   lods =    4.93
  -5.67   0.19   3.76   4.74   4.93   4.76   4.36   3.78   3.06   2.19   1.17   0.00

129H   129H  rec. fracs.=    0.00,   lods =   18.66
  18.64  18.38  17.24  15.74  14.15  12.47  10.69   8.79   6.77   4.63   2.37   0.00

129H   188F  rec. fracs.=    0.00,   lods =    3.91
   3.91   3.86   3.62   3.32   3.00   2.65   2.29   1.90   1.48   1.03   0.54   0.00

129H   64G  rec. fracs.=    0.00,   lods =    3.61
   3.61   3.56   3.35   3.06   2.77   2.45   2.11   1.75   1.37   0.95   0.50   0.00

167A   157F  rec. fracs.=    0.00,   lods =    3.31
   3.30   3.25   2.98   2.63   2.27   1.89   1.50   1.10   0.70   0.35   0.10   0.00

167A   145A  rec. fracs.=    0.05,   lods =    4.25
   3.01   3.93   4.25   4.06   3.71   3.29   2.80   2.25   1.66   1.04   0.45   0.00

176A   47G  rec. fracs.=    0.09,   lods =    7.08
   0.93   4.77   6.83   7.07   6.75   6.18   5.41   4.50   3.45   2.27   1.02   0.00

176A   92D  rec. fracs.=    0.00,   lods =   10.84
  10.82  10.68  10.01   9.14   8.23   7.25   6.22   5.11   3.93   2.68   1.37   0.00

20D   74F  rec. fracs.=    0.07,   lods =   10.45
   4.83   8.61  10.39  10.26   9.56   8.57   7.40   6.06   4.59   3.01   1.40   0.00

33A   121A  rec. fracs.=    0.07,   lods =    4.94
   2.12   4.01   4.90   4.85   4.50   4.02   3.43   2.76   2.02   1.24   0.50   0.00

41A   109D  rec. fracs.=    0.08,   lods =   12.62
   2.14   8.83  12.29  12.54  11.82  10.65   9.18   7.49   5.62   3.64   1.66   0.00

41A   39F  rec. fracs.=    0.23,   lods =    5.78
 -41.63 -17.96  -2.67   2.62   4.81   5.66   5.72   5.23   4.30   3.03   1.53   0.00

41A   135A  rec. fracs.=    0.05,   lods =    7.35
   4.82   6.66   7.35   7.03   6.43   5.69   4.86   3.95   2.97   1.95   0.92   0.00

47G   47G  rec. fracs.=    0.00,   lods =   31.01
  30.95  30.47  28.31  25.51  22.61  19.60  16.48  13.25   9.90   6.44   2.95   0.00

47G   92D  rec. fracs.=    0.03,   lods =    6.77
   5.72   6.59   6.70   6.24   5.63   4.93   4.18   3.36   2.48   1.56   0.64   0.00

47G   176A  rec. fracs.=    0.09,   lods =    7.08
   0.93   4.77   6.83   7.07   6.75   6.18   5.41   4.50   3.45   2.27   1.02   0.00

50400 bytes allocated in orders_morecore

58A   D24  rec. fracs.=    0.03,   lods =    4.71
   3.61   4.49   4.66   4.29   3.77   3.20   2.59   1.97   1.35   0.77   0.29   0.00

66A   101H  rec. fracs.=    0.04,   lods =    4.45
   2.11   3.91   4.42   3.93   3.22   2.45   1.70   1.03   0.51   0.20   0.04   0.00

66A   115Aa  rec. fracs.=    0.04,   lods =    6.70
   1.81   5.46   6.69   5.97   4.80   3.53   2.30   1.26   0.54   0.16   0.03   0.00

66A   120A  rec. fracs.=    0.01,   lods =    8.83
   8.11   8.81   8.21   6.89   5.47   4.07   2.75   1.61   0.78   0.29   0.07   0.00

66A   153F  rec. fracs.=    0.00,   lods =    8.43
   8.40   8.16   7.08   5.75   4.44   3.19   2.06   1.13   0.49   0.16   0.03   0.00

66A   188F  rec. fracs.=    0.00,   lods =    3.91
   3.90   3.81   3.39   2.86   2.34   1.83   1.33   0.88   0.51   0.24   0.06   0.00

66A   195F  rec. fracs.=    0.05,   lods =    6.81
   0.31   4.94   6.80   6.28   5.16   3.88   2.61   1.50   0.69   0.23   0.05   0.00

66A   38F  rec. fracs.=    0.02,   lods =   13.90
  12.31  13.82  13.03  10.93   8.66   6.42   4.32   2.49   1.14   0.37   0.07   0.00

66A   63G  rec. fracs.=    0.02,   lods =   12.50
   9.61  12.12  12.05  10.27   8.20   6.09   4.11   2.38   1.10   0.36   0.07   0.00
